# Supplementary material for: Structure–activity relationships of hydrophobic alkyl acrylamides as tissue transglutaminase inhibitors
Source: Royal Society of Chemistry journal article supplement (doi:10.1039/d1md00382h), 2022-01-01

## Supporting Information:

# Structure-Activity Relationships of Hydrophobic Alkyl Acrylamides as Tissue Transglutaminase Inhibitors

*Alana M. M. Rangaswamy, Pauline Navals, Eric W. J. Gates, Sammir Shad, Sarah K. I. Watt,  
Jeffrey W. Keillor\**

Department of Chemistry and Biomolecular Sciences, University of Ottawa,  
Ottawa, Ontario K1N 6N5, Canada

\* Corresponding author: [jkeillor@uottawa.ca](mailto:jkeillor@uottawa.ca)

### TABLE OF CONTENTS

|                                                                                                                    |    |
|--------------------------------------------------------------------------------------------------------------------|----|
| TABLE S1: COMPARISON OF $K_{\text{INACT}}/K_{\text{I}}$ RATIOS OBTAINED FROM LINEAR VS NON-LINEAR REGRESSION ..... | 2  |
| FIGURE S1: COMPARISON OF PROTEIN MODELS.....                                                                       | 3  |
| TABLE S2: SUMMARY OF DOCKING RESULTS USING CRYSTALLOGRAPHIC STRUCTURE 3S3J. ....                                   | 4  |
| HPLC ANALYSES.....                                                                                                 | 5  |
| NMR SPECTRA.....                                                                                                   | 17 |

**Table S1:** Comparison of  $k_{\text{inact}}/K_I$  ratios obtained from linear vs non-linear regression

| Compd. | $k_{\text{inact}}/K_I$ ( $10^3 \text{ M}^{-1}\text{min}^{-1}$ ) |                  |
|--------|-----------------------------------------------------------------|------------------|
|        | Non-linear hyperbolic (all [I])                                 | Linear (low [I]) |
| 22a    | 412 ± 142                                                       | 290 ± 30         |
| 23a    | 1508 ± 1608                                                     | 1250 ± 40        |
| 24a    | 27.5 ± 18.6                                                     | 20 ± 1           |
| 25a    | 108 ± 37                                                        | 79 ± 7           |

## Figure S1: Comparison of protein models

Structural differences between two crystallographic structures of TG2, namely 2Q3Z (left) and 3S3J (right).

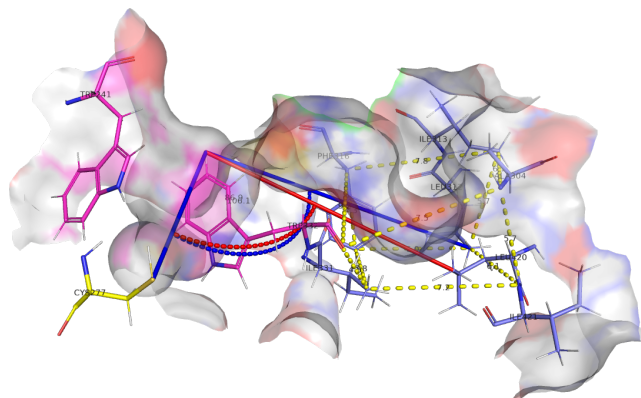

2Q3Z

Angle (SH\_CYS277, H5\_TRP332, CH3\_LEU312) = 106°

Angle (SH\_CYS277, H5\_TRP332, CH3\_LEU420) = 87°

Approximate  $V_{\text{cavity}}$  (Ca\_PHE316, CO\_LEU420, Ca\_ALA304) = 250 Å<sup>3</sup>

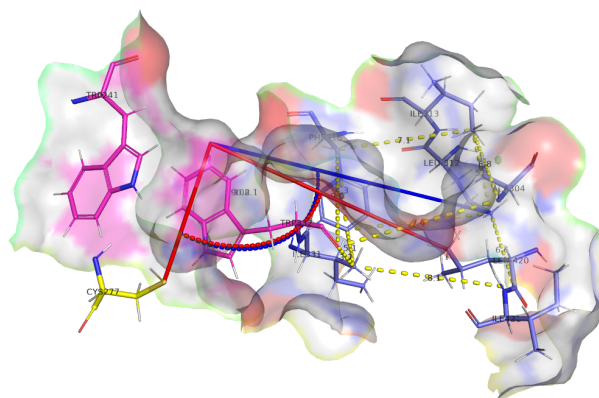

3S3J

Angle (SH\_CYS277, H5\_TRP332, CH3\_LEU312) = 108°

Angle (SH\_CYS277, H5\_TRP332, CH3\_LEU420) = 90°

Approximate  $V_{\text{cavity}}$  (Ca\_PHE316, CO\_LEU420, Ca\_ALA304) = 236 Å<sup>3</sup>

**Table S2:** Summary of docking results using crystallographic structure 3S3J.

| Compound   | n | Non-covalent |       | Covalent |       |
|------------|---|--------------|-------|----------|-------|
|            |   | S score      | d (Å) | S score  | d (Å) |
| <b>22a</b> | 1 | -5.73        | 5.3   | -5.61    | 5.3   |
| <b>22b</b> | 2 | -4.97        | 9.2   | -5.45    | 8.2   |
| <b>22c</b> | 3 | -6.58        | 3.9   | -5.79    | 4.6   |
| <b>22d</b> | 4 | -6.58        | 3.7   | -6.45    | 4.1   |
| <b>22e</b> | 5 | -6.36        | 4.1   | -6.14    | 4.5   |
| <b>23a</b> | 1 | -6.19        | 5.1   | -5.65    | 7.8   |
| <b>23b</b> | 2 | -5.77        | 7.9   | -5.46    | 7     |
| <b>23c</b> | 3 | -6.20        | 4.6   | -5.70    | 6.8   |
| <b>23d</b> | 4 | -7.05        | 3.6   | -5.21    | 7.2   |
| <b>23e</b> | 5 | -7.32        | 6     | -6.38    | 4.6   |
| <b>24a</b> | 1 | -6.22        | 6.6   | -5.80    | 5.1   |
| <b>24b</b> | 2 | -6.51        | 4.4   | -5.99    | 4.6   |
| <b>24c</b> | 3 | -6.48        | 4.4   | -6.05    | 4.4   |
| <b>24d</b> | 4 | -6.61        | 4.8   | -6.08    | 5.4   |
| <b>24e</b> | 5 | -6.99        | 4.2   | -6.20    | 5.2   |

## HPLC Analyses

The purity of the final inhibitors was determined by Gilson-Mandel GXP271 high performance liquid chromatography (HPLC) with UV detection at 214 and 254 nm (Phenomenex Luna, 150 mm × 4.6 mm, 30 min, 1.5 mL/min flow rate, 5-95% 0.1% TFA in CH<sub>3</sub>CN/0.1% TFA in H<sub>2</sub>O).

| <b>Inhibitor</b> | <b>Retention Time (min)</b> | <b>Purity (%)</b> |
|------------------|-----------------------------|-------------------|
| <b>22a</b>       | 16.082                      | 96.298            |
| <b>22b</b>       | 16.323                      | 99.474            |
| <b>22c</b>       | 16.498                      | 97.823            |
| <b>22d</b>       | 16.952                      | 97.395            |
| <b>22e</b>       | 17.643                      | 90.742            |
| <b>23a</b>       | 12.363                      | 100               |
| <b>23b</b>       | 12.679                      | 98.442            |
| <b>23c</b>       | 12.847                      | 96.059            |
| <b>23d</b>       | 13.354                      | 96.171            |
| <b>23e</b>       | 14.068                      | 93.84             |
| <b>24a</b>       | 13.578                      | 97.965            |
| <b>24b</b>       | 13.816                      | 97.99             |
| <b>24c</b>       | 14.052                      | 97.772            |
| <b>24d</b>       | 14.556                      | 97.923            |
| <b>24e</b>       | 15.335                      | 98.592            |
| <b>25a</b>       | 16.631                      | 97.057            |

## 22a

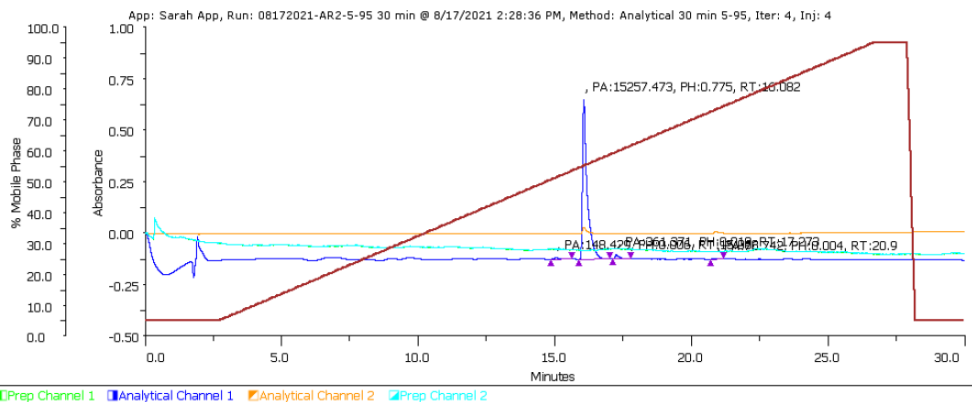

Sample Table

| Injection Number | Peak Name | Retention Time (min) | Area (nAU/min x100) | Height (AU) | Sample Name | Sample Location  | Fraction Site(s) | Area % |
|------------------|-----------|----------------------|---------------------|-------------|-------------|------------------|------------------|--------|
| 4                | 1         | 16.082               | 15257.4729          | 0.775       | AR2-82      | Sample Zone->153 |                  | 96.298 |
| 4                | 2         | 17.273               | 361.3712            | 0.019       | AR2-82      | Sample Zone->153 |                  | 2.281  |
| 4                | 3         | 20.9                 | 76.7417             | 0.004       | AR2-82      | Sample Zone->153 |                  | 0.484  |
| 4                | 4         | 15.068               | 148.4287            | 0.006       | AR2-82      | Sample Zone->153 |                  | 0.937  |

## 22b

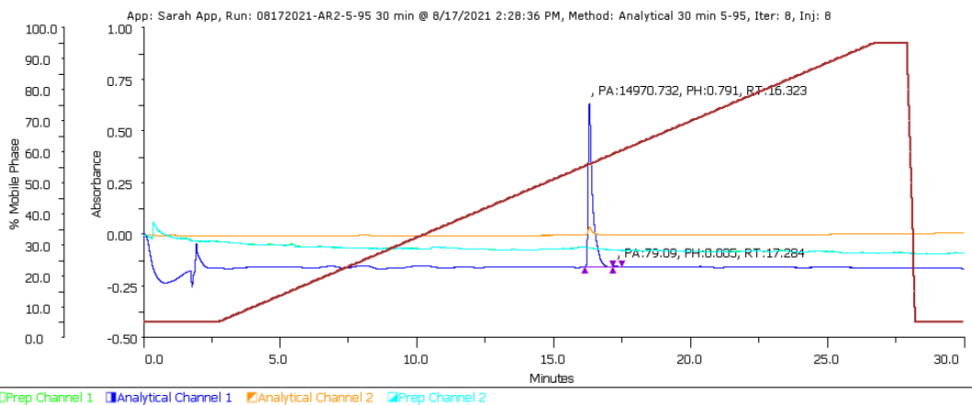

Sample Table

| Injection Number | Peak Name | Retention Time (min) | Area (nAU/min x100) | Height (AU) | Sample Name | Sample Location  | Fraction Site(s) | Area % |
|------------------|-----------|----------------------|---------------------|-------------|-------------|------------------|------------------|--------|
| 8                | 1         | 16.323               | 14970.7325          | 0.791       | AR2-74      | Sample Zone->152 |                  | 99.474 |
| 8                | 2         | 17.284               | 79.0903             | 0.005       | AR2-74      | Sample Zone->152 |                  | 0.526  |

## 22c

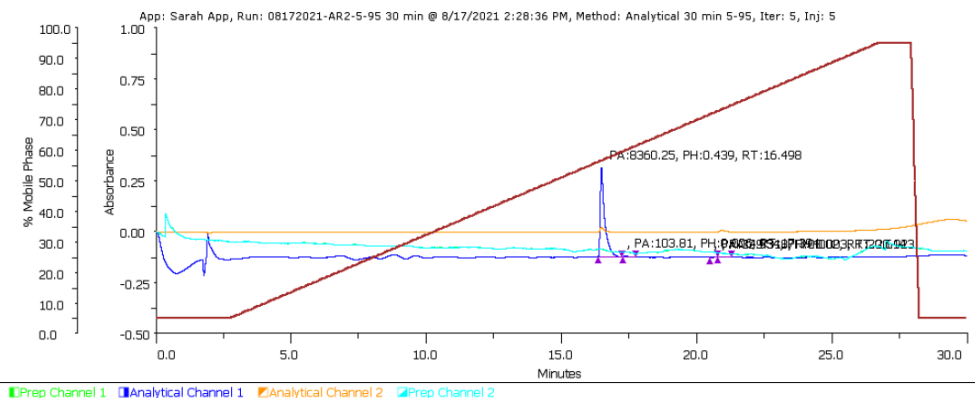

Sample Table

| Injection Number | Peak Name | Retention Time (min) | Area (nAUmin x100) | Height (AU) | Sample Name | Sample Location  | Fraction Site(s) | Area % |
|------------------|-----------|----------------------|--------------------|-------------|-------------|------------------|------------------|--------|
| 5                | 1         | 16.498               | 8360.2504          | 0.439       | AR2-80      | Sample Zone->154 |                  | 97.823 |
| 5                | 2         | 17.394               | 103.81             | 0.006       | AR2-80      | Sample Zone->154 |                  | 1.215  |
| 5                | 3         | 20.614               | 32.9538            | 0.002       | AR2-80      | Sample Zone->154 |                  | 0.386  |
| 5                | 4         | 20.923               | 49.3179            | 0.003       | AR2-80      | Sample Zone->154 |                  | 0.577  |

## 22d

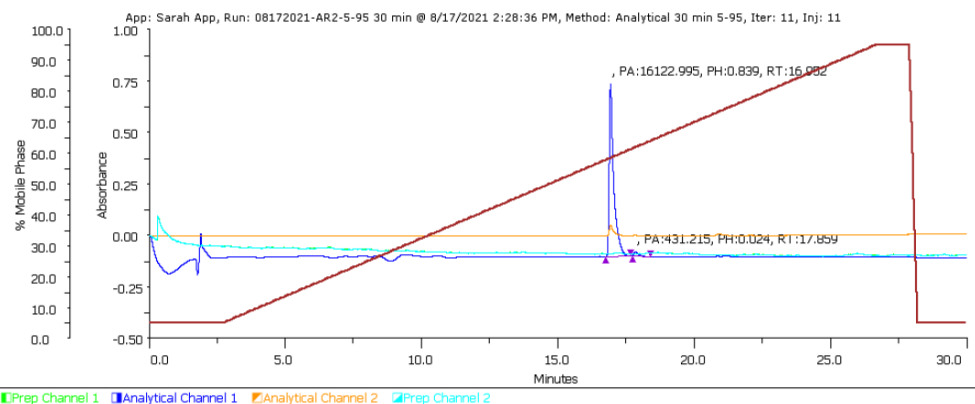

Sample Table

| Injection Number | Peak Name | Retention Time (min) | Area (nAUmin x100) | Height (AU) | Sample Name | Sample Location  | Fraction Site(s) | Area % |
|------------------|-----------|----------------------|--------------------|-------------|-------------|------------------|------------------|--------|
| 11               | 1         | 16.952               | 16122.9947         | 0.839       | AR2-89      | Sample Zone->155 |                  | 97.395 |
| 11               | 2         | 17.859               | 431.2154           | 0.024       | AR2-89      | Sample Zone->155 |                  | 2.605  |

22e

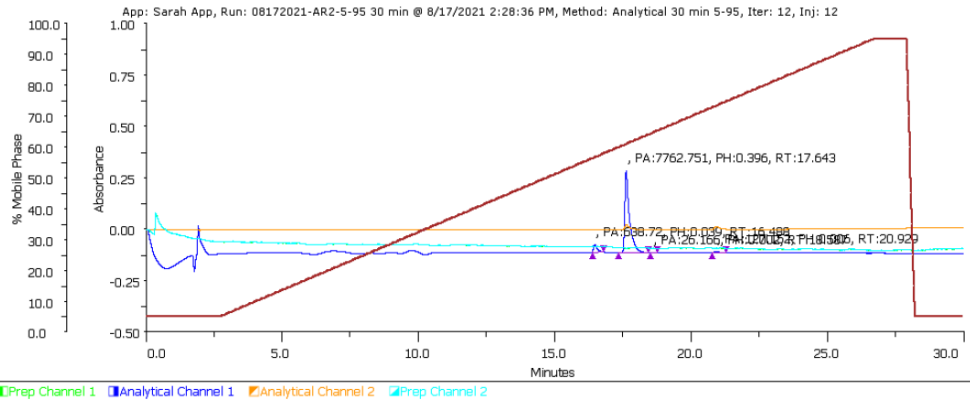

Sample Table

| Injection Number | Peak Name | Retention Time (min) | Area (nAUmin x100) | Height (AU) | Sample Name | Sample Location  | Fraction Site(s) | Area % |
|------------------|-----------|----------------------|--------------------|-------------|-------------|------------------|------------------|--------|
| 12               | 1         | 16.488               | 638.7204           | 0.039       | AR2-90      | Sample Zone->148 |                  | 7.466  |
| 12               | 2         | 17.643               | 7762.7512          | 0.396       | AR2-90      | Sample Zone->148 |                  | 90.742 |
| 12               | 3         | 20.929               | 127.1522           | 0.006       | AR2-90      | Sample Zone->148 |                  | 1.486  |
| 12               | 4         | 18.587               | 26.1666            | 0.002       | AR2-90      | Sample Zone->148 |                  | 0.306  |



### 23a

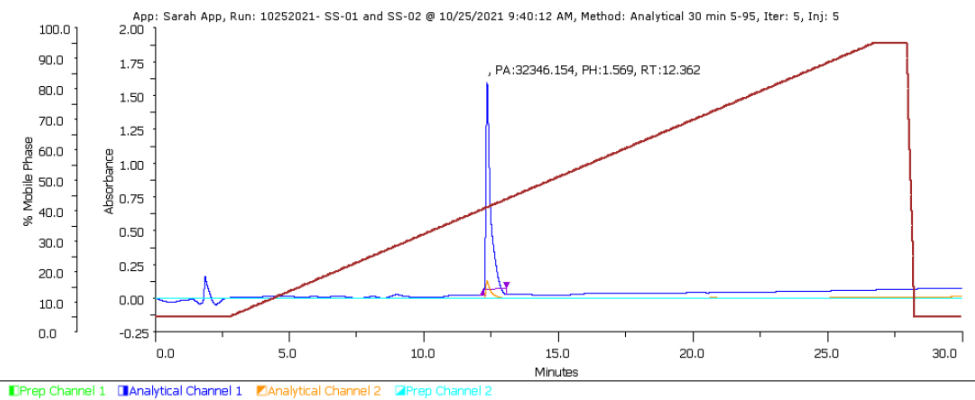

Sample Table

| Injection Number | Peak Name | Retention Time (min) | Area (nAUmin x100) | Height (AU) | Sample Name | Sample Location  | Fraction Site(s) | Area % |
|------------------|-----------|----------------------|--------------------|-------------|-------------|------------------|------------------|--------|
| 5                | 1         | 12.362               | 32346.1535         | 1.569       | SS-01       | Sample Zone->148 |                  | 100    |

### 23b

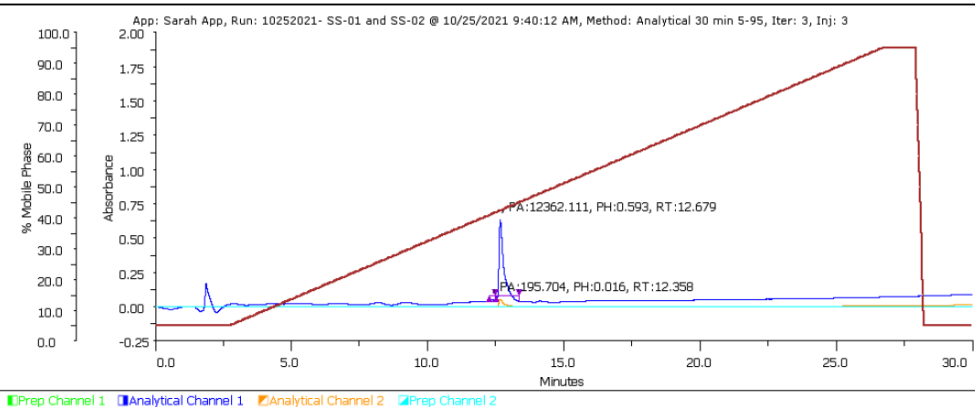

Sample Table

| Injection Number | Peak Name | Retention Time (min) | Area (nAUmin x100) | Height (AU) | Sample Name | Sample Location  | Fraction Site(s) | Area % |
|------------------|-----------|----------------------|--------------------|-------------|-------------|------------------|------------------|--------|
| 3                | 1         | 12.358               | 195.7043           | 0.016       | SS-02       | Sample Zone->149 |                  | 1.558  |
| 3                | 2         | 12.679               | 12362.1108         | 0.593       | SS-02       | Sample Zone->149 |                  | 98.442 |

23c

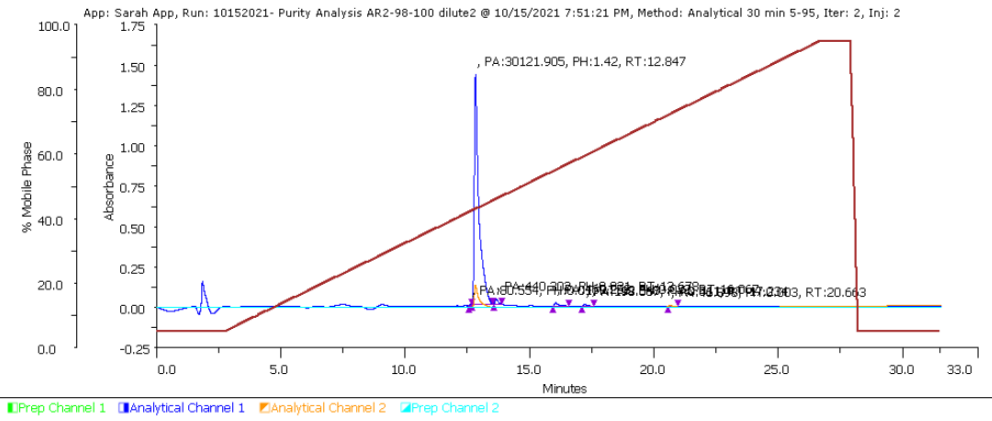

Sample Table

| Injection Number | Peak Name | Retention Time (min) | Area (mAUmin x100) | Height (AU) | Sample Name | Sample Location  | Fraction Site(s) | Area % |
|------------------|-----------|----------------------|--------------------|-------------|-------------|------------------|------------------|--------|
| 2                | 1         | 12.847               | 30121.9049         | 1.42        | AR2-98      | Sample Zone->152 |                  | 96.059 |
| 2                | 2         | 13.678               | 440.3021           | 0.031       | AR2-98      | Sample Zone->152 |                  | 1.404  |
| 2                | 3         | 16.067               | 469.2582           | 0.022       | AR2-98      | Sample Zone->152 |                  | 1.496  |
| 2                | 4         | 17.234               | 198.6667           | 0.011       | AR2-98      | Sample Zone->152 |                  | 0.634  |
| 2                | 5         | 20.663               | 46.8985            | 0.003       | AR2-98      | Sample Zone->152 |                  | 0.15   |
| 2                | 6         | 12.648               | 80.5541            | 0.01        | AR2-98      | Sample Zone->152 |                  | 0.257  |

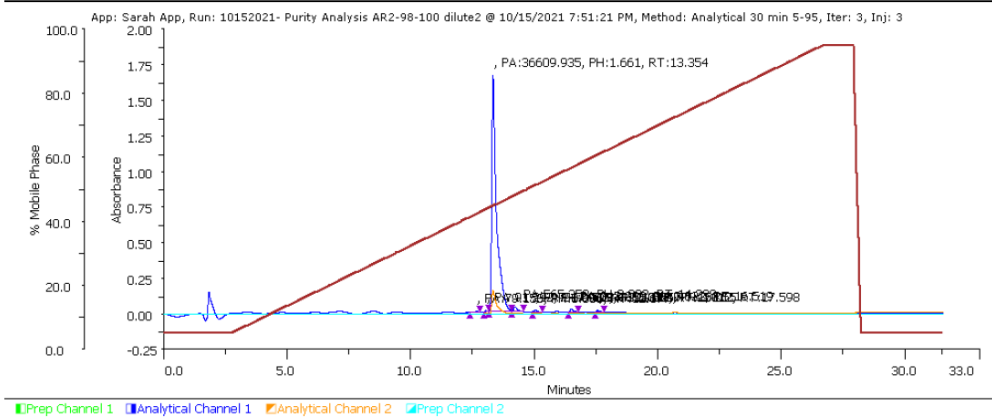

Sample Table

| Injection Number | Peak Name | Retention Time (min) | Area (nA/min x100) | Height (AU) | Sample Name | Sample Location  | Fraction Site(s) | Area % |
|------------------|-----------|----------------------|--------------------|-------------|-------------|------------------|------------------|--------|
| 3                | 1         | 12.677               | 79.1575            | 0.006       | AR2-99      | Sample Zone->153 |                  | 0.208  |
| 3                | 2         | 13.057               | 91.2922            | 0.009       | AR2-99      | Sample Zone->153 |                  | 0.24   |
| 3                | 3         | 13.354               | 36609.9346         | 1.661       | AR2-99      | Sample Zone->153 |                  | 96.171 |
| 3                | 4         | 14.238               | 565.3516           | 0.032       | AR2-99      | Sample Zone->153 |                  | 1.485  |
| 3                | 5         | 15.055               | 217.9062           | 0.012       | AR2-99      | Sample Zone->153 |                  | 0.572  |
| 3                | 6         | 16.519               | 312.288            | 0.022       | AR2-99      | Sample Zone->153 |                  | 0.82   |
| 3                | 7         | 17.598               | 191.6038           | 0.012       | AR2-99      | Sample Zone->153 |                  | 0.503  |

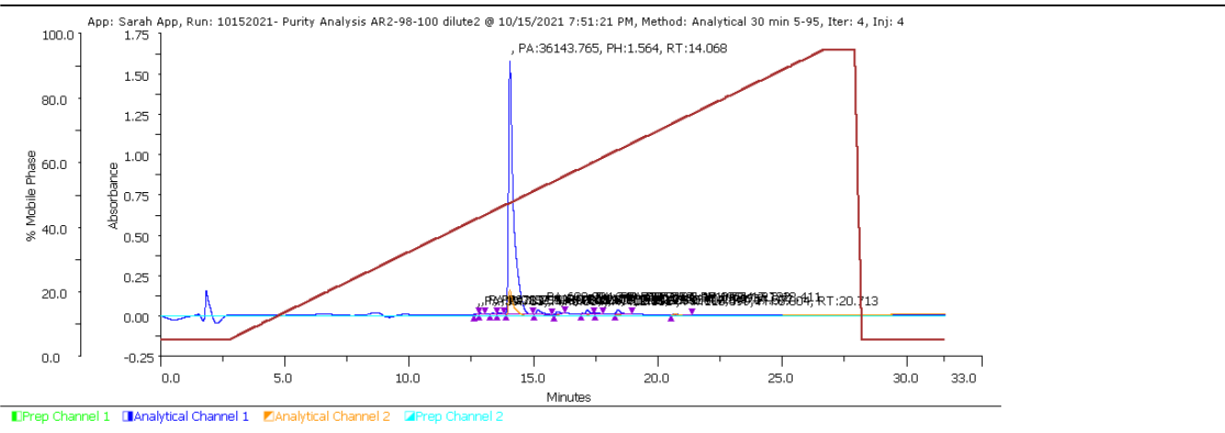

Sample Table

| Injection Number | Peak Name | Retention Time (min) | Area (nAUmin x100) | Height (AU) | Sample Name | Sample Location  | Fraction Site(s) | Area % |
|------------------|-----------|----------------------|--------------------|-------------|-------------|------------------|------------------|--------|
| 4                | 1         | 12.681               | 39.7333            | 0.004       | AR2-100     | Sample Zone->154 |                  | 0.103  |
| 4                | 2         | 12.874               | 69.182             | 0.006       | AR2-100     | Sample Zone->154 |                  | 0.18   |
| 4                | 3         | 13.656               | 132.536            | 0.009       | AR2-100     | Sample Zone->154 |                  | 0.344  |
| 4                | 4         | 14.068               | 36143.7648         | 1.564       | AR2-100     | Sample Zone->154 |                  | 93.84  |
| 4                | 5         | 15.196               | 680.9043           | 0.027       | AR2-100     | Sample Zone->154 |                  | 1.768  |
| 4                | 6         | 15.975               | 266.1555           | 0.016       | AR2-100     | Sample Zone->154 |                  | 0.691  |
| 4                | 7         | 17.182               | 349.7175           | 0.021       | AR2-100     | Sample Zone->154 |                  | 0.908  |
| 4                | 8         | 17.577               | 109.0098           | 0.007       | AR2-100     | Sample Zone->154 |                  | 0.283  |
| 4                | 9         | 18.411               | 530.5577           | 0.024       | AR2-100     | Sample Zone->154 |                  | 1.377  |
| 4                | 10        | 13.366               | 78.2836            | 0.006       | AR2-100     | Sample Zone->154 |                  | 0.203  |
| 4                | 11        | 20.713               | 116.699            | 0.004       | AR2-100     | Sample Zone->154 |                  | 0.303  |

## 24a

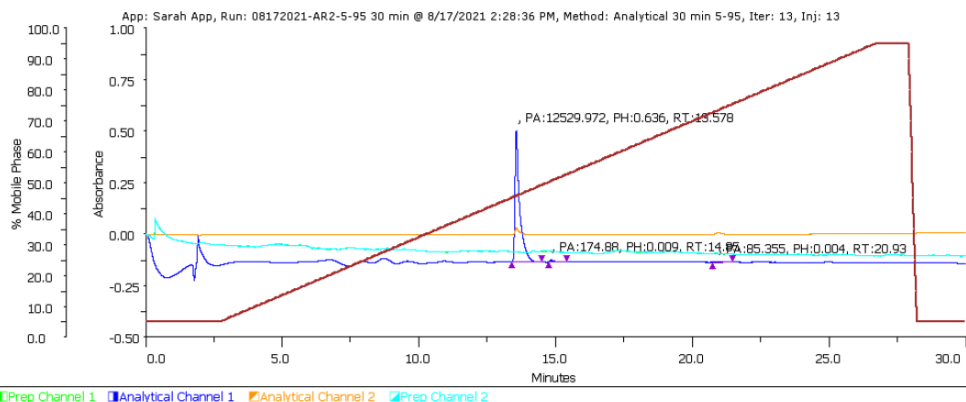

Sample Table

| Injection Number | Peak Name | Retention Time (min) | Area (nAU/min x100) | Height (AU) | Sample Name | Sample Location  | Fraction Site(s) | Area % |
|------------------|-----------|----------------------|---------------------|-------------|-------------|------------------|------------------|--------|
| 13               | 1         | 13.578               | 12529.9715          | 0.636       | AR2-43      | Sample Zone->149 |                  | 97.965 |
| 13               | 2         | 14.85                | 174.8805            | 0.009       | AR2-43      | Sample Zone->149 |                  | 1.367  |
| 13               | 3         | 20.93                | 85.355              | 0.004       | AR2-43      | Sample Zone->149 |                  | 0.667  |

## 24b

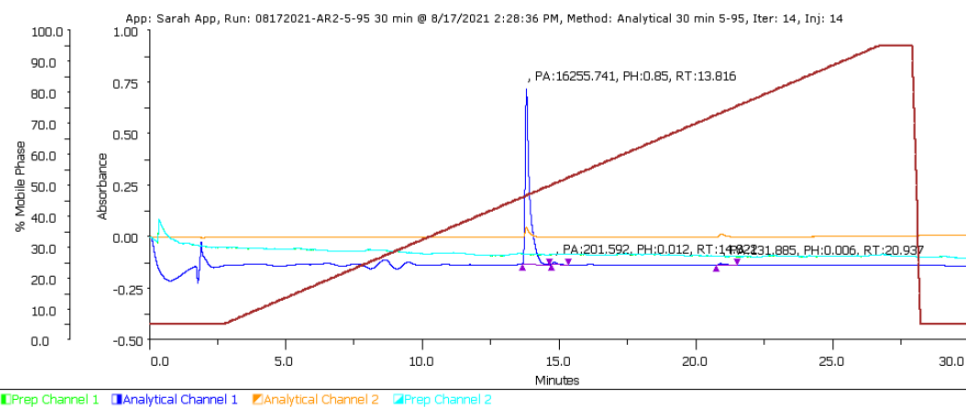

Sample Table

| Injection Number | Peak Name | Retention Time (min) | Area (nAU/min x100) | Height (AU) | Sample Name | Sample Location  | Fraction Site(s) | Area % |
|------------------|-----------|----------------------|---------------------|-------------|-------------|------------------|------------------|--------|
| 14               | 1         | 13.816               | 16255.7412          | 0.85        | AR2-44      | Sample Zone->150 |                  | 97.99  |
| 14               | 2         | 14.822               | 201.5925            | 0.012       | AR2-44      | Sample Zone->150 |                  | 1.215  |
| 14               | 3         | 20.937               | 131.8853            | 0.006       | AR2-44      | Sample Zone->150 |                  | 0.795  |

## 24c

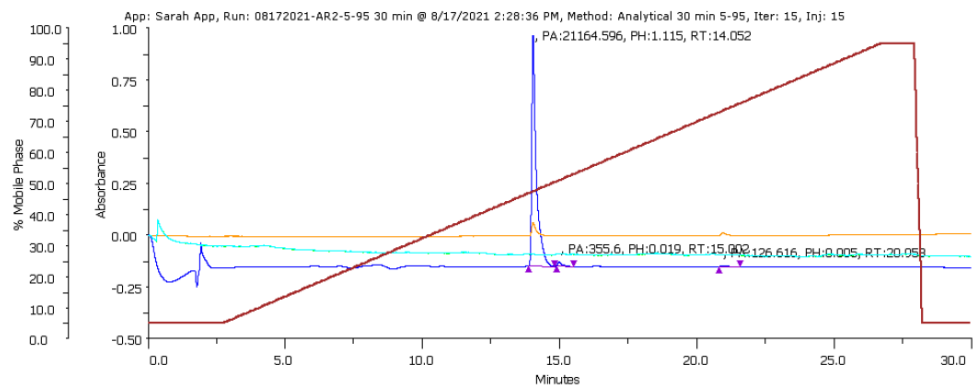

Sample Table

| Injection Number | Peak Name | Retention Time (min) | Area (nAUmin x100) | Height (AU) | Sample Name | Sample Location  | Fraction Site(s) | Area % |
|------------------|-----------|----------------------|--------------------|-------------|-------------|------------------|------------------|--------|
| 15               | 1         | 14.052               | 21164.5964         | 1.115       | AR2-45      | Sample Zone->151 |                  | 97.772 |
| 15               | 2         | 15.002               | 355.5997           | 0.019       | AR2-45      | Sample Zone->151 |                  | 1.643  |
| 15               | 3         | 20.958               | 126.6156           | 0.005       | AR2-45      | Sample Zone->151 |                  | 0.585  |

## 24d

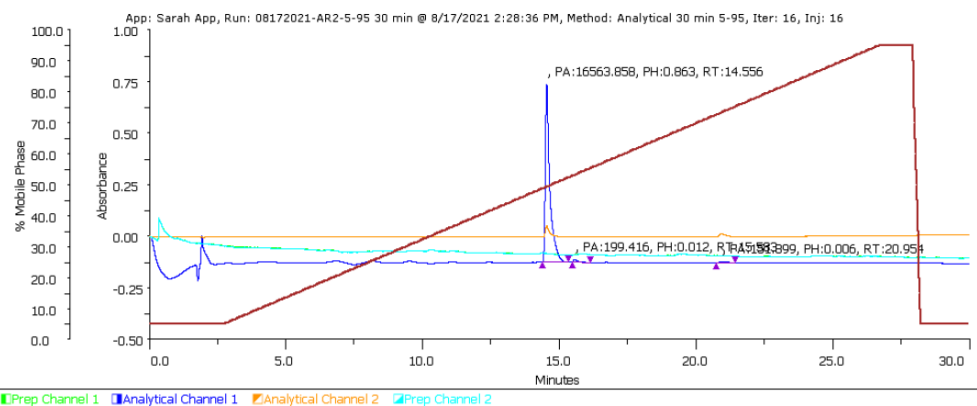

Sample Table

| Injection Number | Peak Name | Retention Time (min) | Area (nAUmin x100) | Height (AU) | Sample Name | Sample Location  | Fraction Site(s) | Area % |
|------------------|-----------|----------------------|--------------------|-------------|-------------|------------------|------------------|--------|
| 16               | 1         | 14.556               | 16563.8581         | 0.863       | AR2-46      | Sample Zone->144 |                  | 97.923 |
| 16               | 2         | 15.583               | 199.4161           | 0.012       | AR2-46      | Sample Zone->144 |                  | 1.179  |
| 16               | 3         | 20.954               | 151.8965           | 0.006       | AR2-46      | Sample Zone->144 |                  | 0.898  |

24e

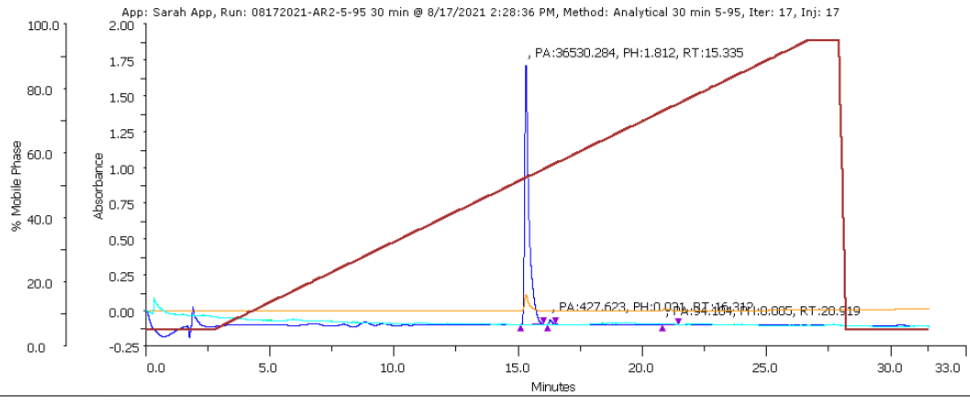

Sample Table

| Injection Number | Peak Name | Retention Time (min) | Area (nAUmin x100) | Height (AU) | Sample Name | Sample Location  | Fraction Site(s) | Area % |
|------------------|-----------|----------------------|--------------------|-------------|-------------|------------------|------------------|--------|
| 17               | 1         | 15.335               | 36530.2839         | 1.812       | AR2-47      | Sample Zone->145 |                  | 98.592 |
| 17               | 2         | 16.312               | 427.6225           | 0.031       | AR2-47      | Sample Zone->145 |                  | 1.154  |
| 17               | 3         | 20.919               | 94.1039            | 0.005       | AR2-47      | Sample Zone->145 |                  | 0.254  |

# 25a

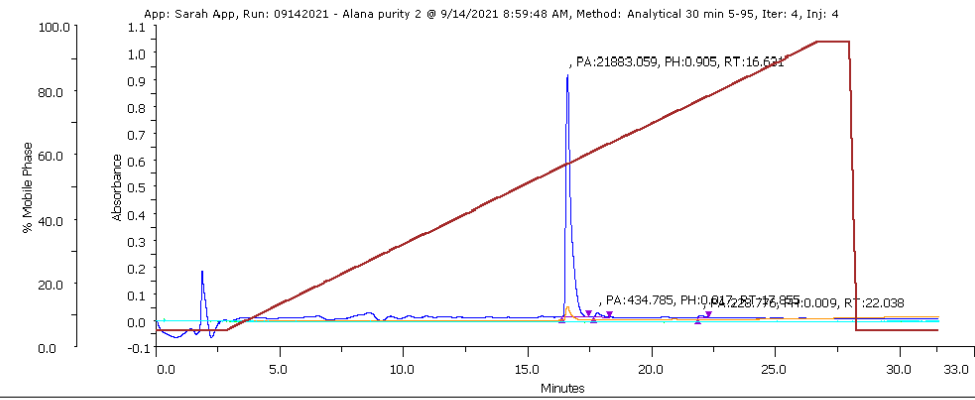

Sample Table

| Injection Number | Peak Name | Retention Time (min) | Area (mAUmin x100) | Height (AU) | Sample Name | Sample Location  | Fraction Site(s) | Area % |
|------------------|-----------|----------------------|--------------------|-------------|-------------|------------------|------------------|--------|
| 4                | 1         | 16.631               | 21883.0587         | 0.905       | AR2-77      | Sample Zone->152 |                  | 97.057 |
| 4                | 2         | 17.855               | 434.7949           | 0.017       | AR2-77      | Sample Zone->152 |                  | 1.928  |
| 4                | 3         | 22.038               | 228.776            | 0.009       | AR2-77      | Sample Zone->152 |                  | 1.015  |



# NMR Spectra

The  $^1\text{H}$ - and  $^{13}\text{C}$ -NMR spectra of all final compounds are shown here:

$^1\text{H}$  NMR spectrum (400 MHz,  $\text{CDCl}_3$ ) of **22a** :

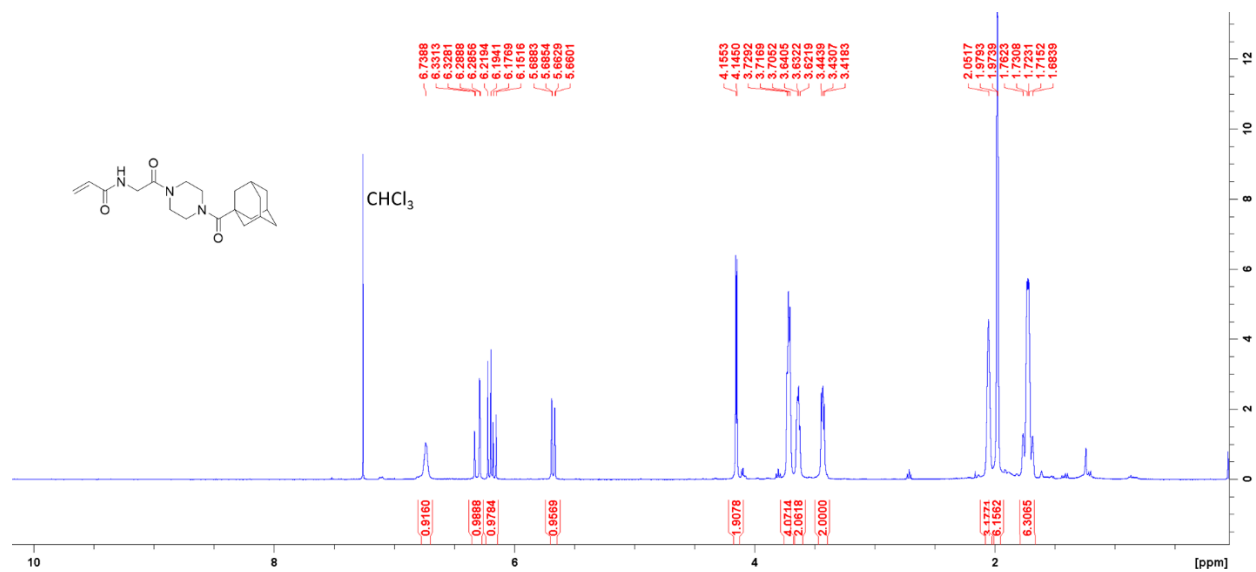

$^{13}\text{C}$  NMR spectrum (101 MHz,  $\text{CDCl}_3$ ) of **22a** :

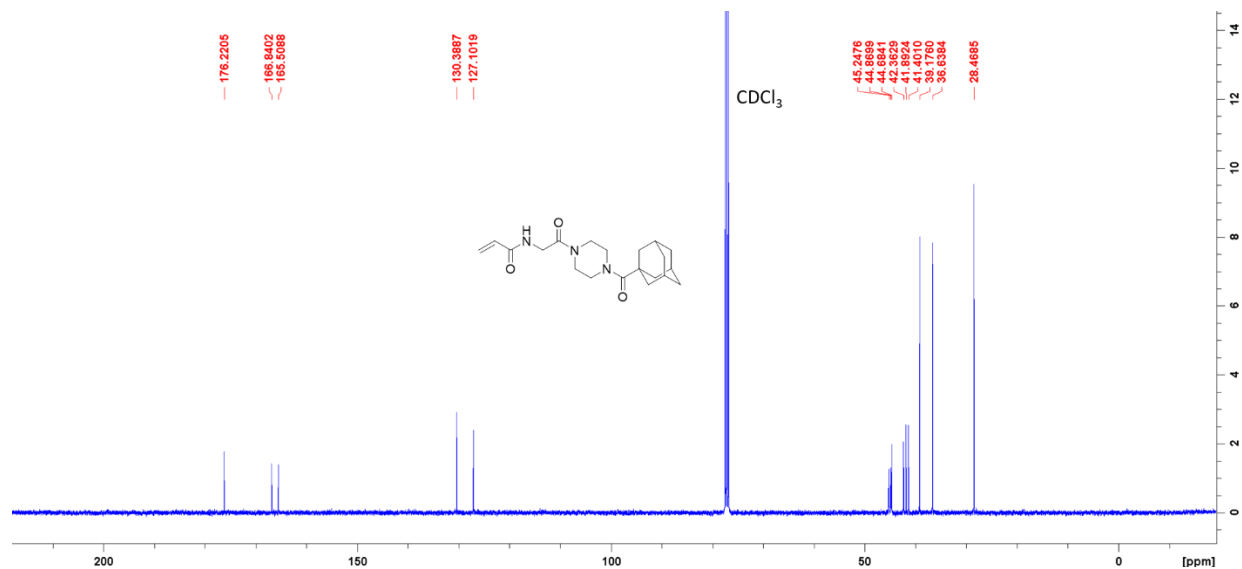

$^1\text{H}$  NMR spectrum (400 MHz,  $\text{CDCl}_3$ ) of **22b** :

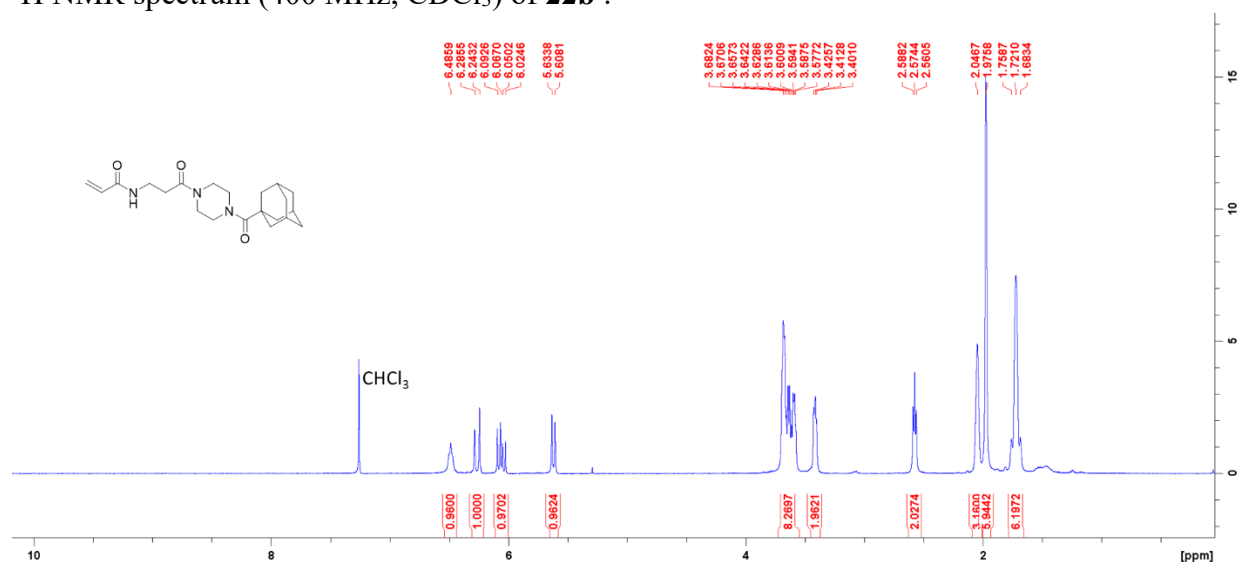

$^{13}\text{C}$  NMR spectrum (101 MHz,  $\text{CDCl}_3$ ) of **22b** :

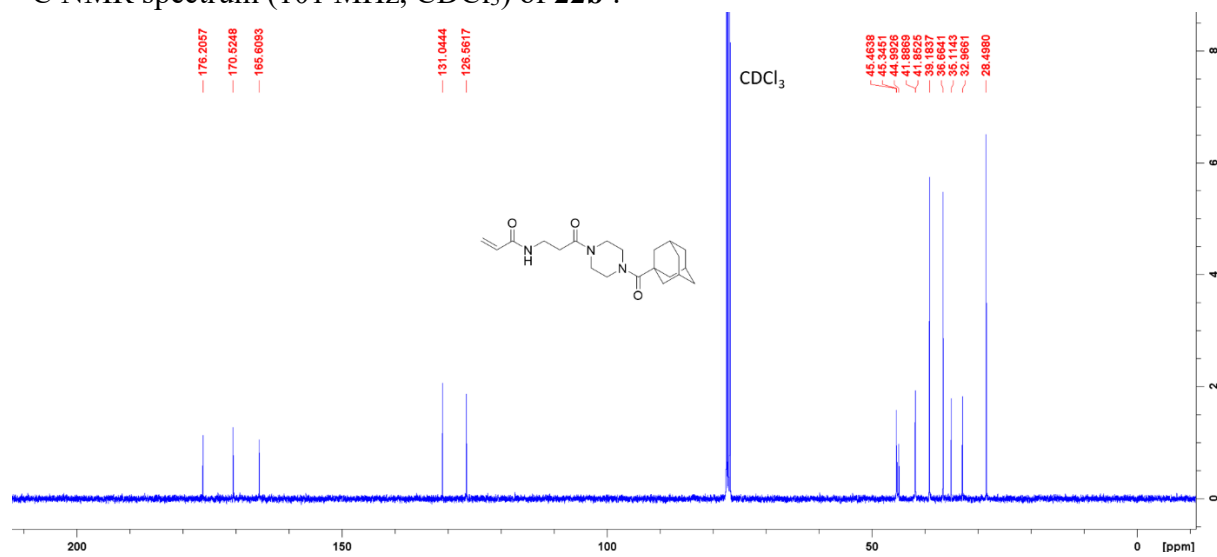

$^1\text{H}$  NMR spectrum (400 MHz,  $\text{CDCl}_3$ ) of **22c** :

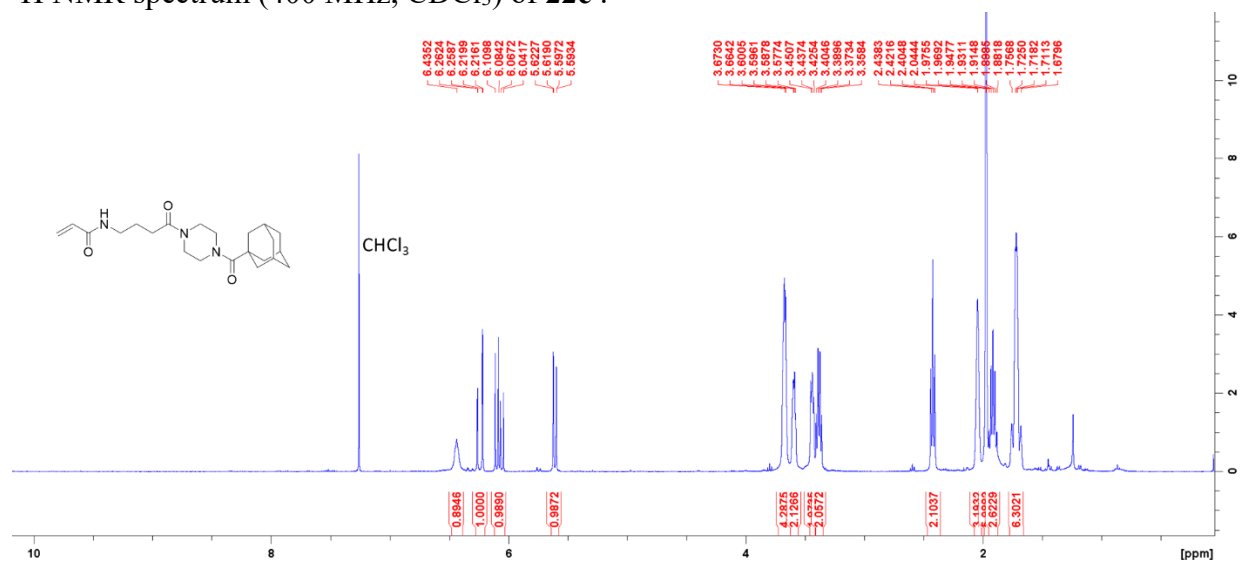

$^{13}\text{C}$  NMR spectrum (101 MHz,  $\text{CDCl}_3$ ) of **22c** :

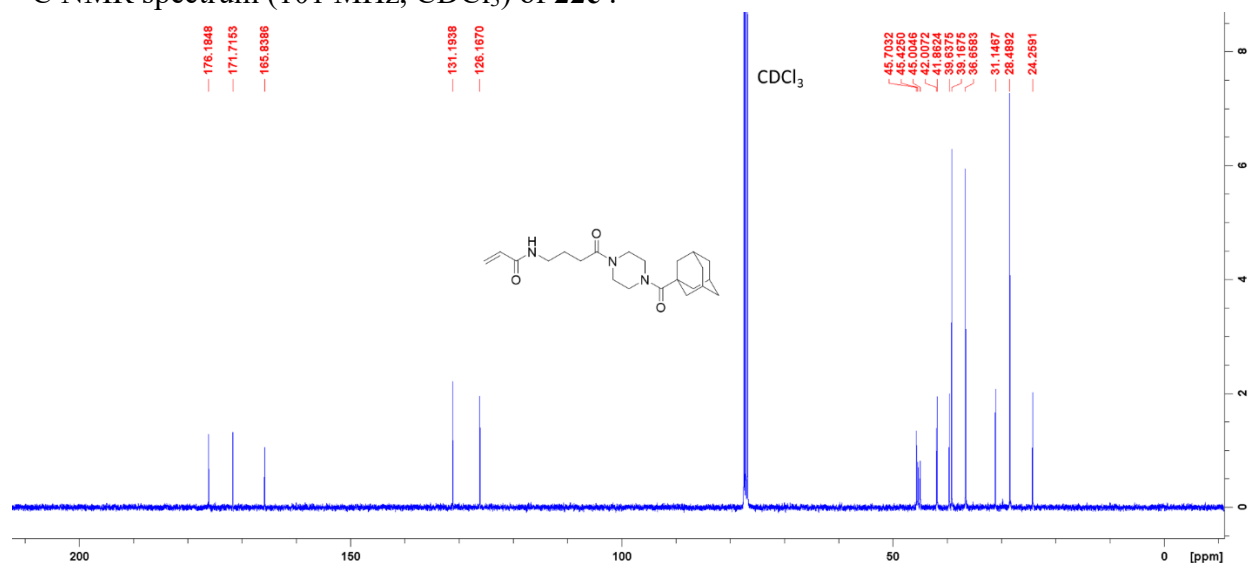

$^1\text{H}$  NMR spectrum (400 MHz,  $\text{CDCl}_3$ ) of **22d** :

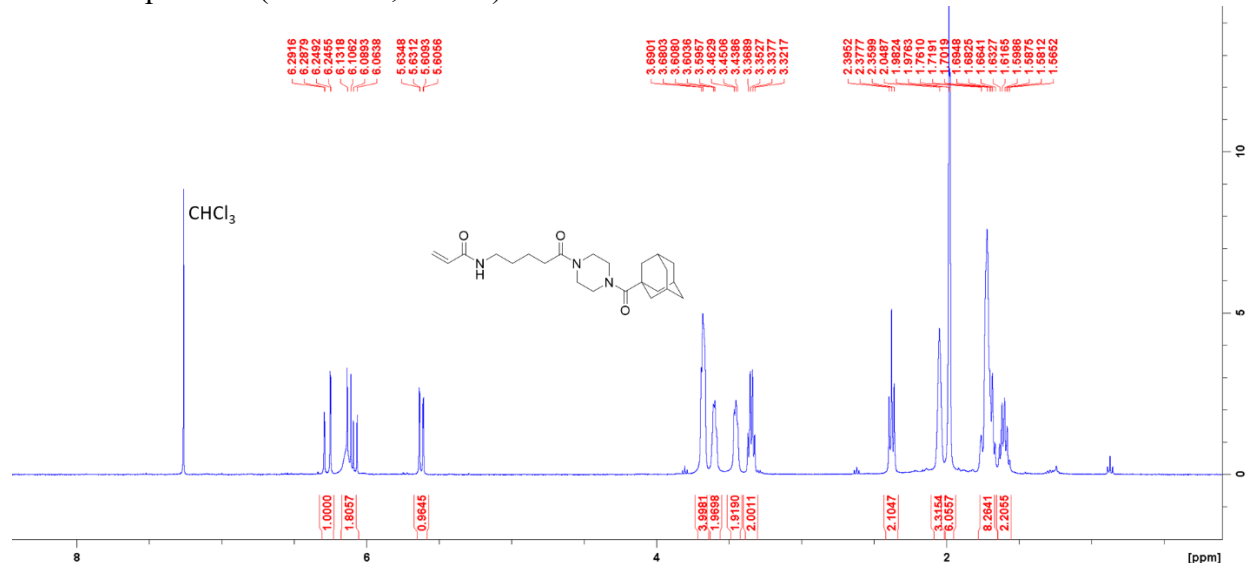

$^{13}\text{C}$  NMR spectrum (101 MHz,  $\text{CDCl}_3$ ) of **22d** :

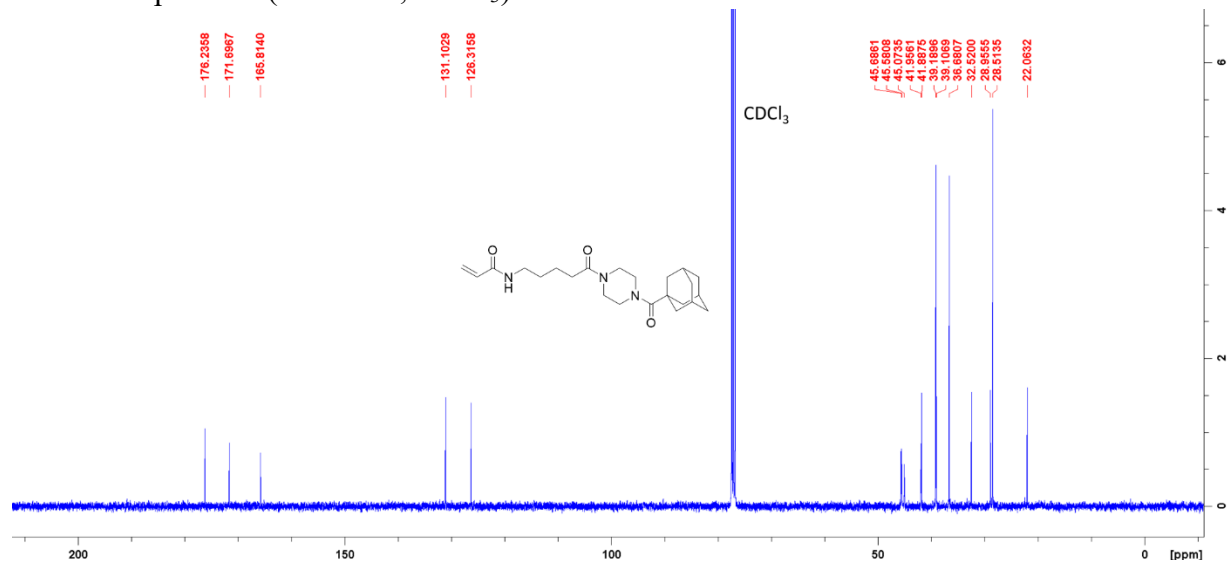

$^1\text{H}$  NMR spectrum (400 MHz,  $\text{CDCl}_3$ ) of **22e** :

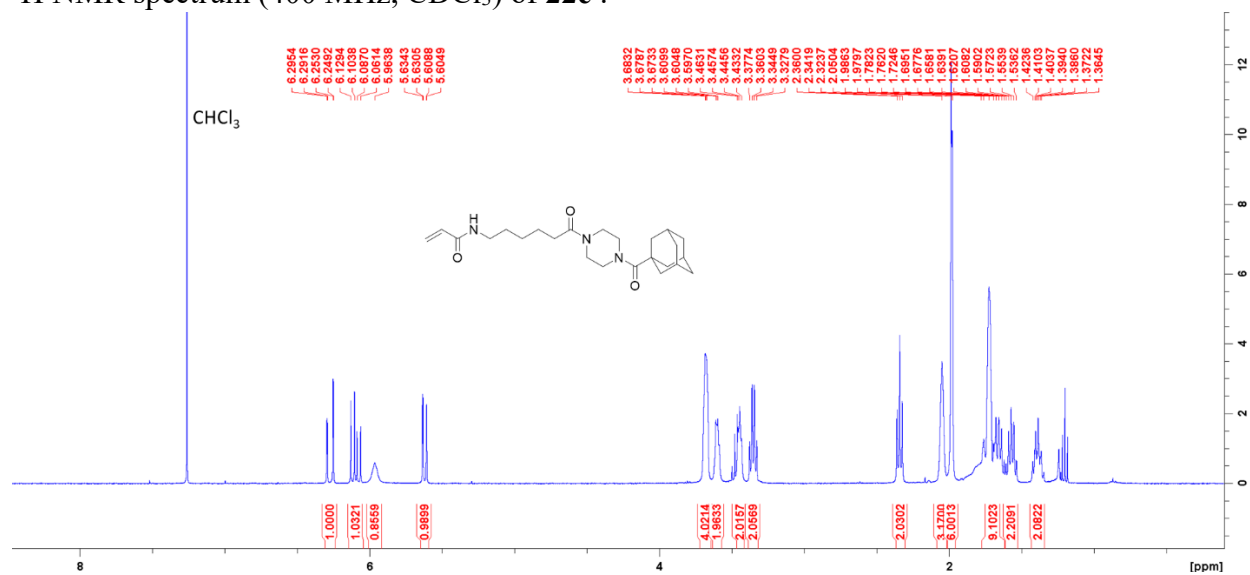

$^{13}\text{C}$  NMR spectrum (101 MHz,  $\text{CDCl}_3$ ) of **22e** :

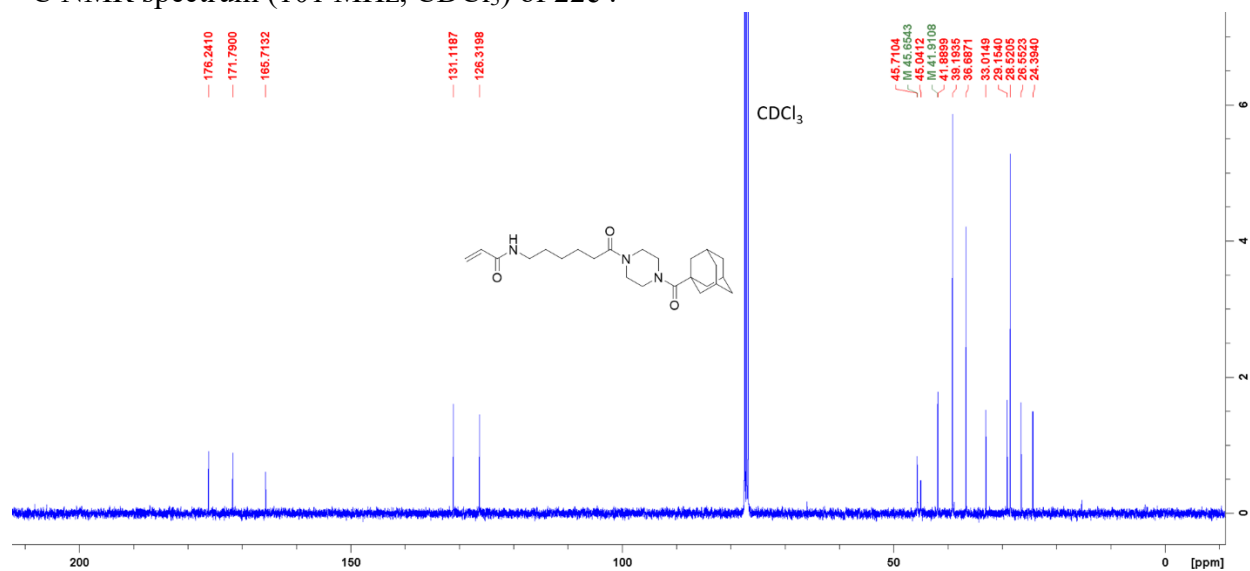

$^1\text{H}$  NMR spectrum (400 MHz,  $\text{CDCl}_3$ ) of **23a** :

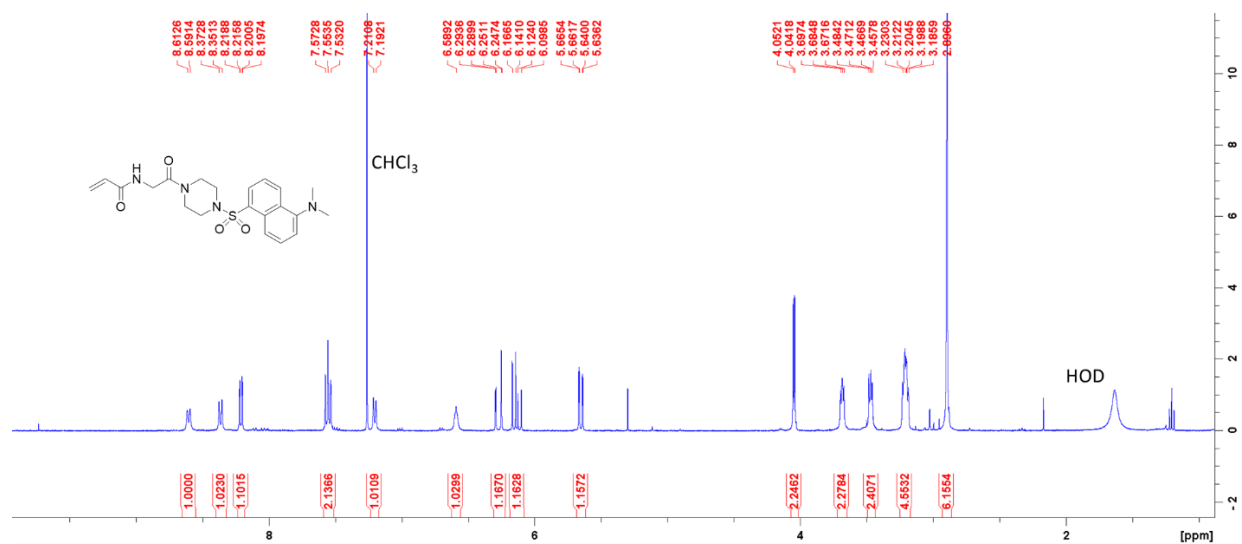

$^{13}\text{C}$  NMR spectrum (101 MHz,  $\text{CDCl}_3$ ) of **23a** :

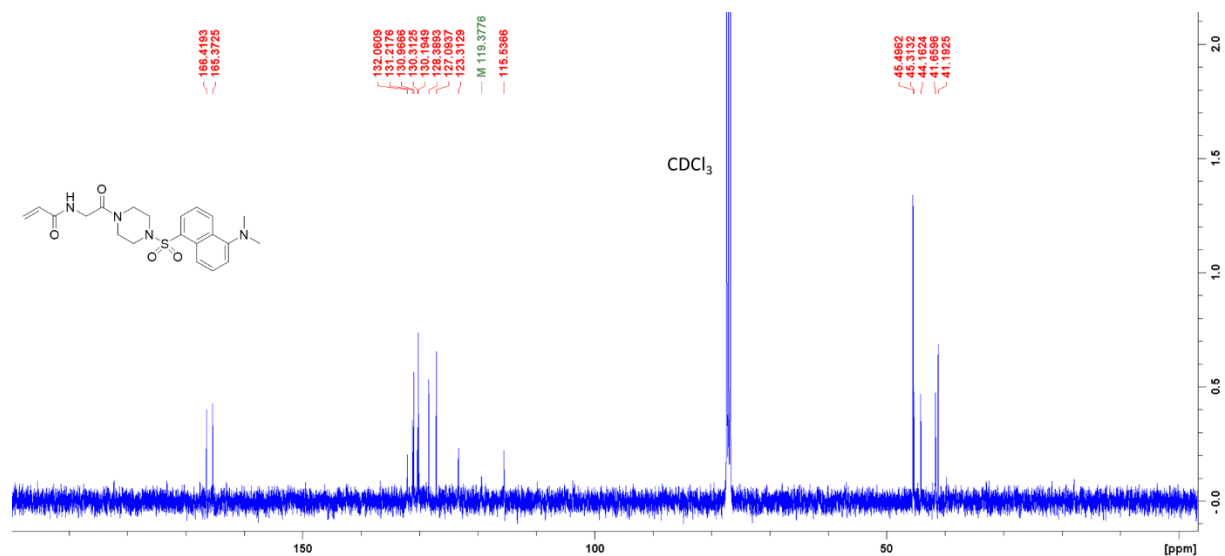

<sup>1</sup>H NMR spectrum (400 MHz, CDCl<sub>3</sub>) of **23b**:

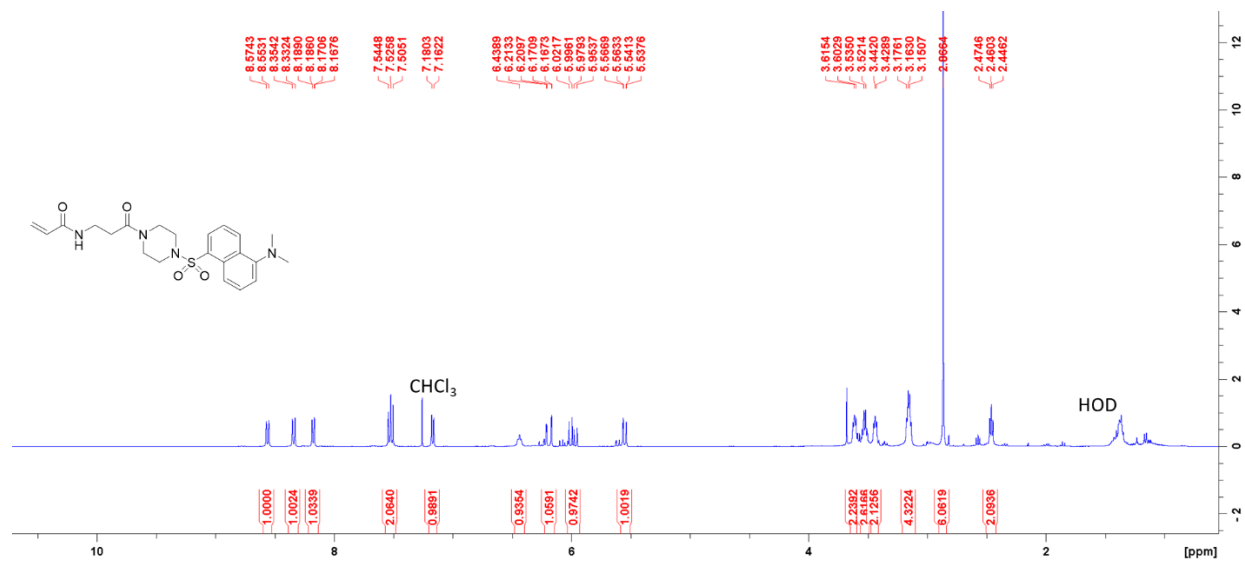

<sup>13</sup>C NMR spectrum (101 MHz, CDCl<sub>3</sub>) of **23b**:

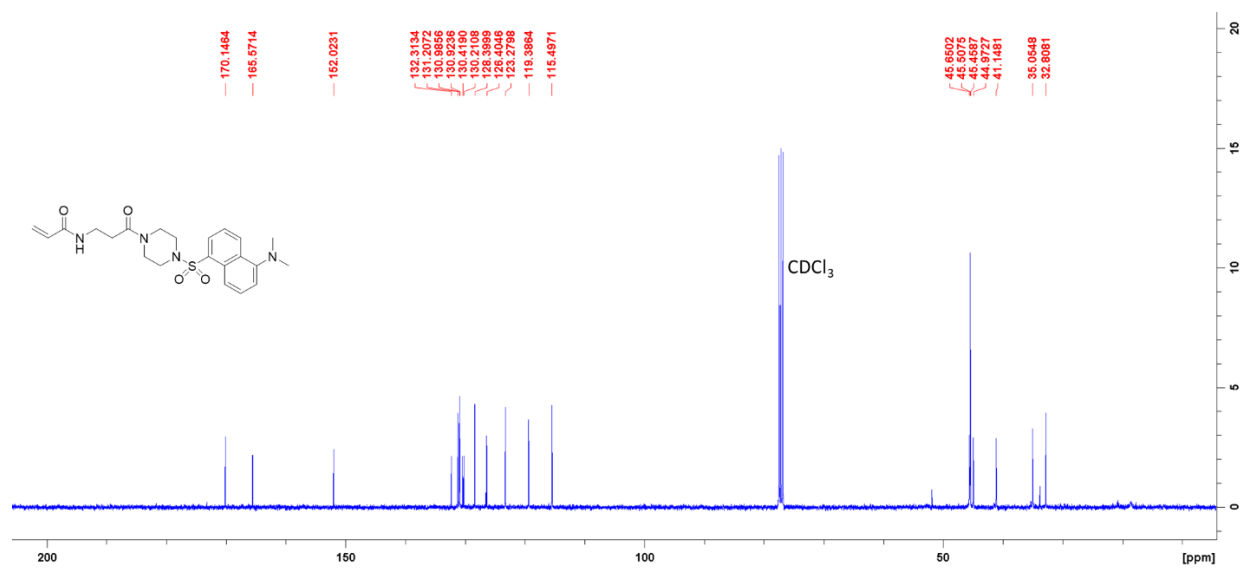

<sup>1</sup>H NMR spectrum (400 MHz, CDCl<sub>3</sub>) of **23c**:

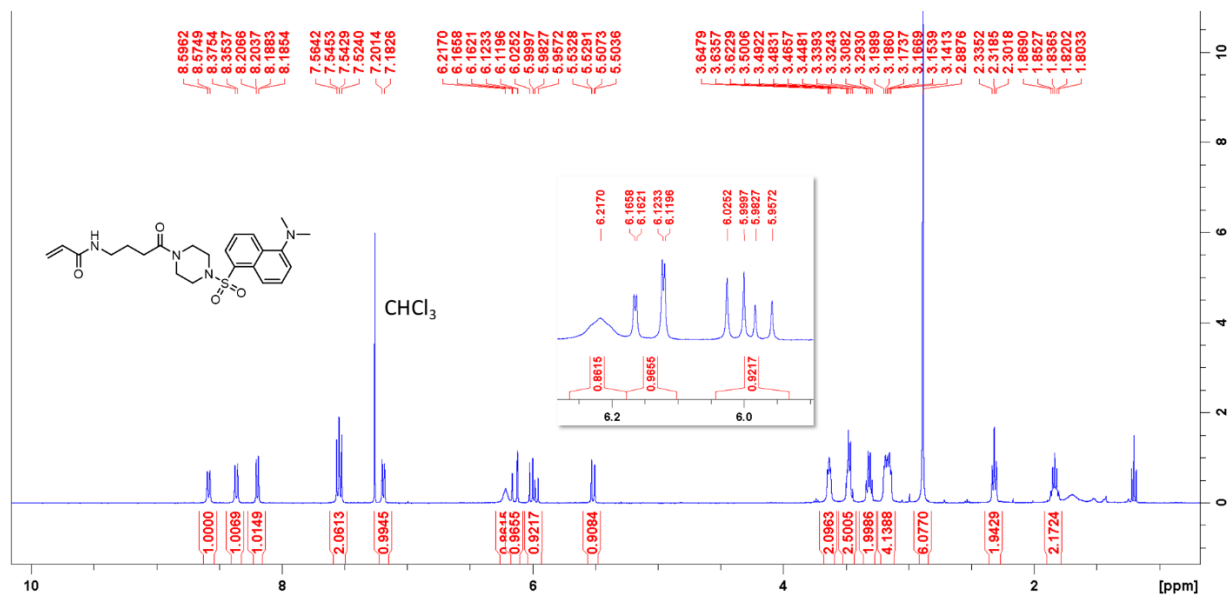

<sup>13</sup>C NMR spectrum (101 MHz, CDCl<sub>3</sub>) of **23c**:

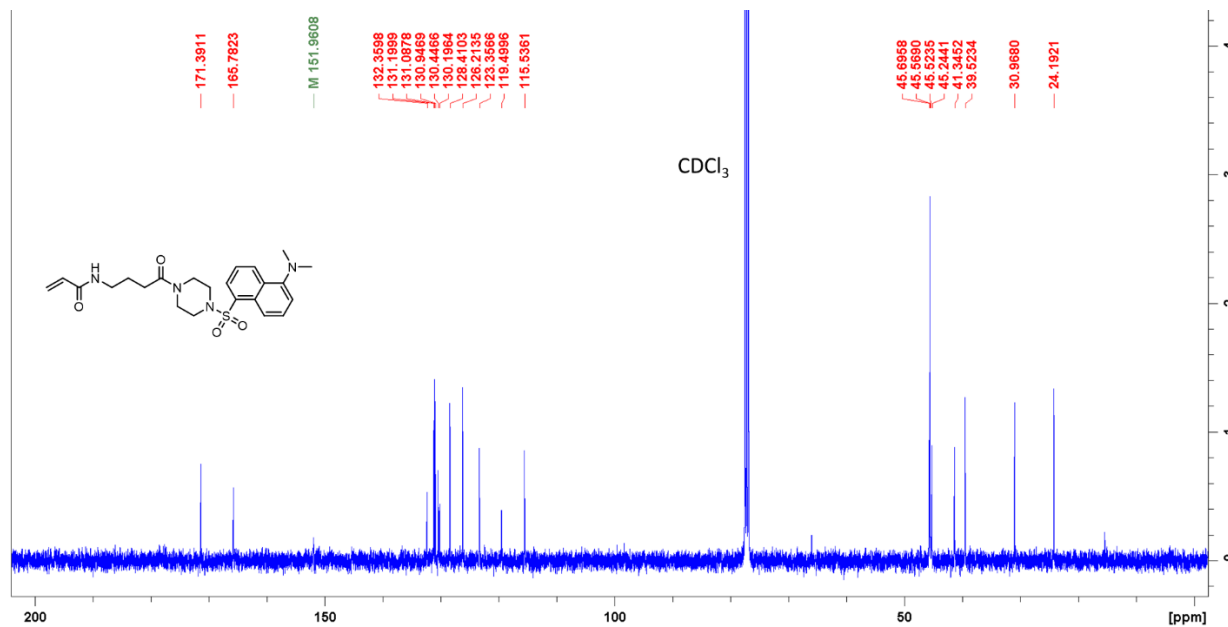



<sup>1</sup>H NMR spectrum (400 MHz, CDCl<sub>3</sub>) of **23d**:

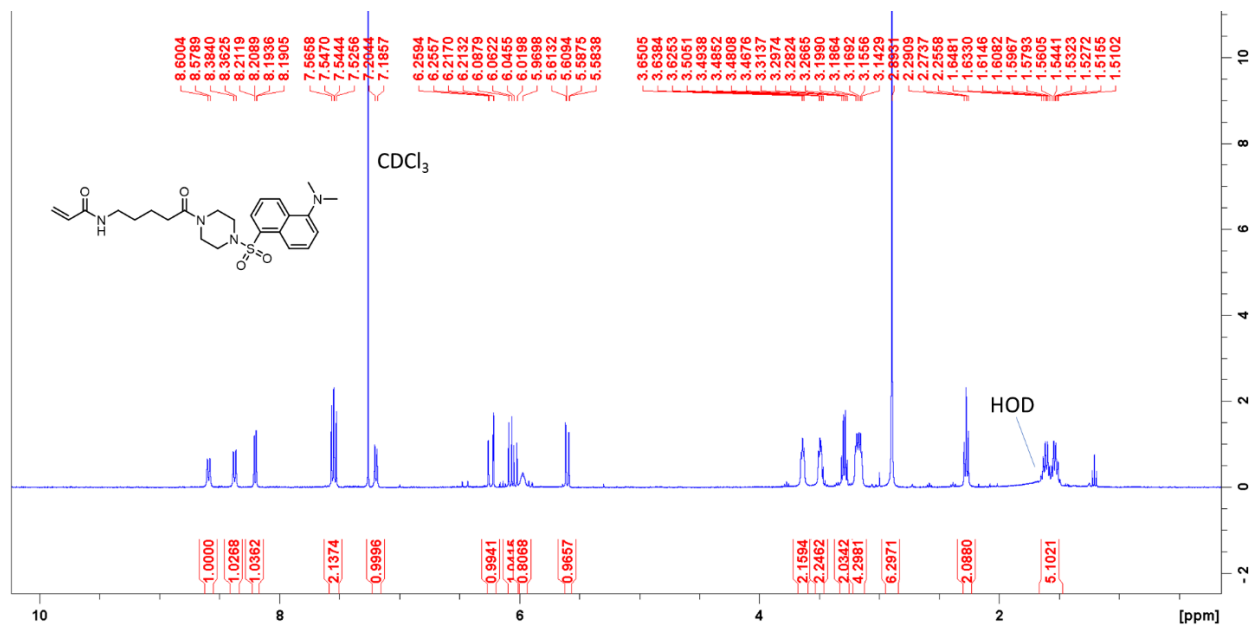

<sup>13</sup>C NMR spectrum (101 MHz, CDCl<sub>3</sub>) of **23d**:

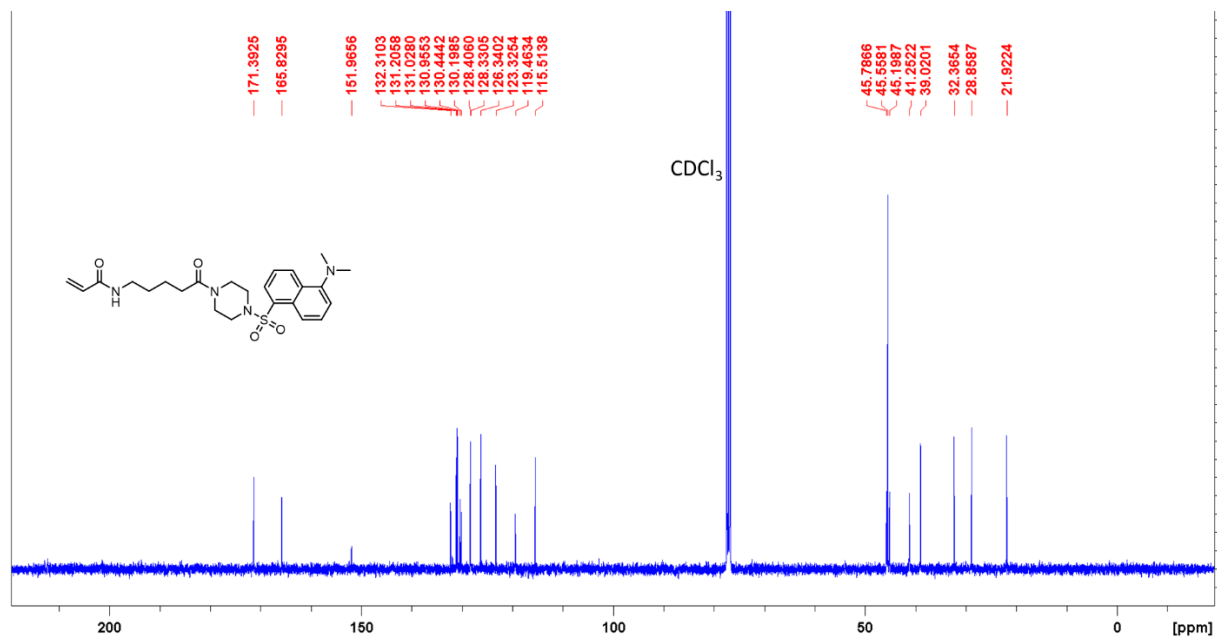

$^1\text{H}$  NMR spectrum (400 MHz,  $\text{CDCl}_3$ ) of **23e**:

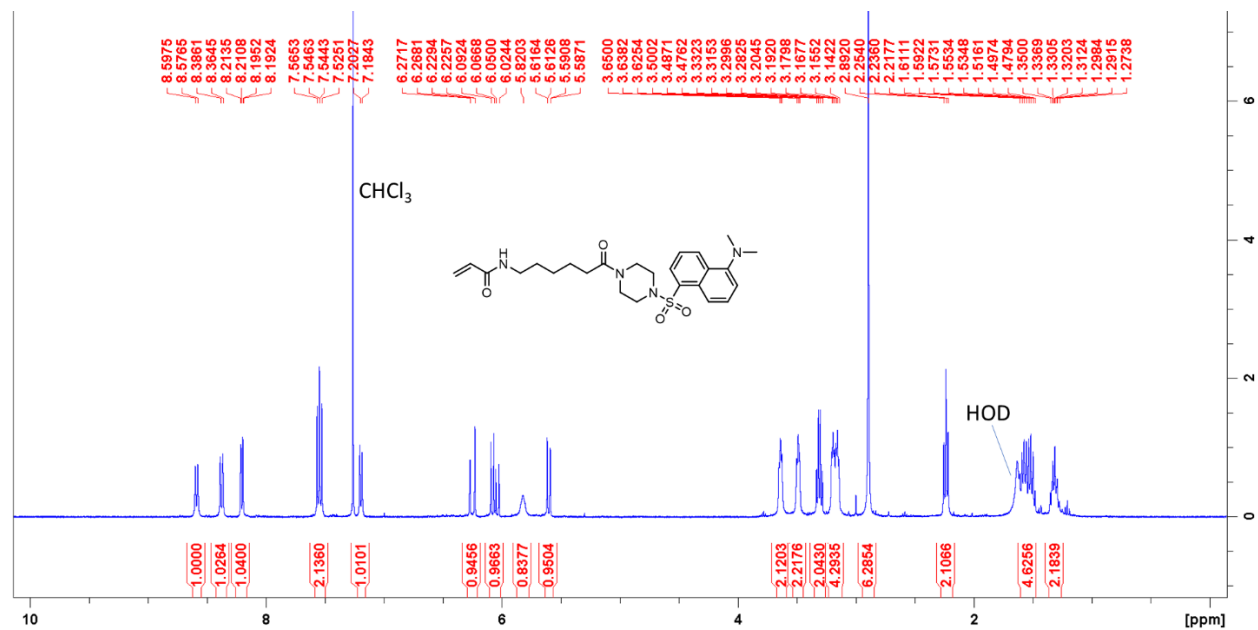

$^{13}\text{C}$  NMR spectrum (101 MHz,  $\text{CDCl}_3$ ) of **23e**:

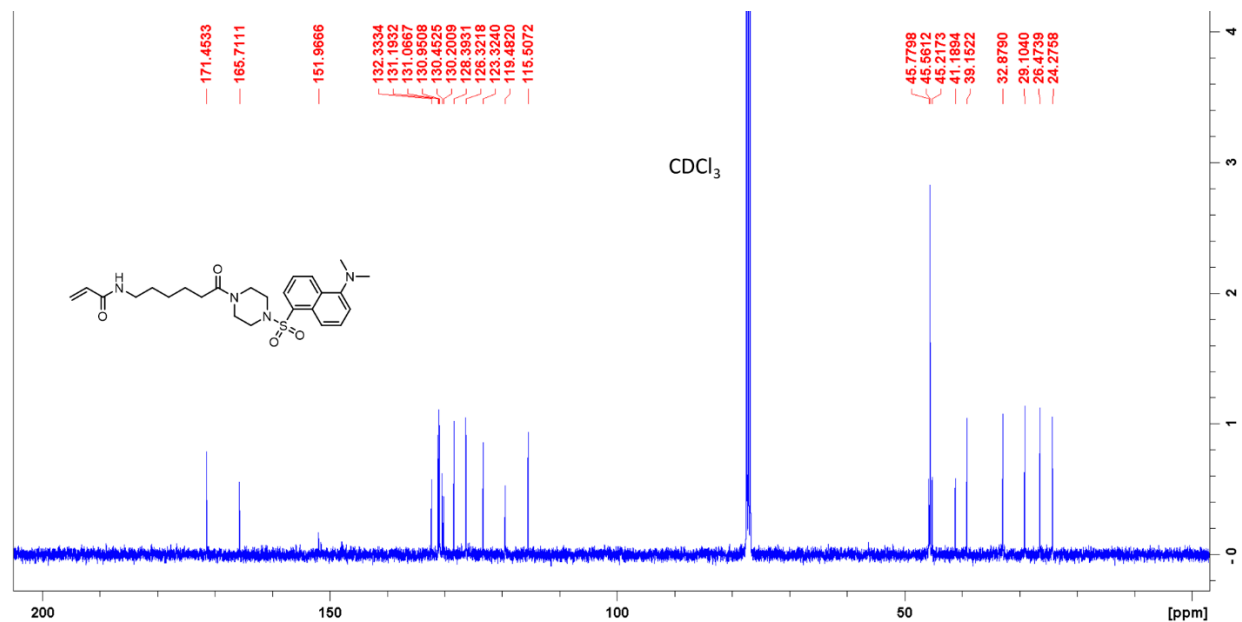

$^1\text{H}$  NMR spectrum (400 MHz,  $\text{CDCl}_3$ ) of **24a**:

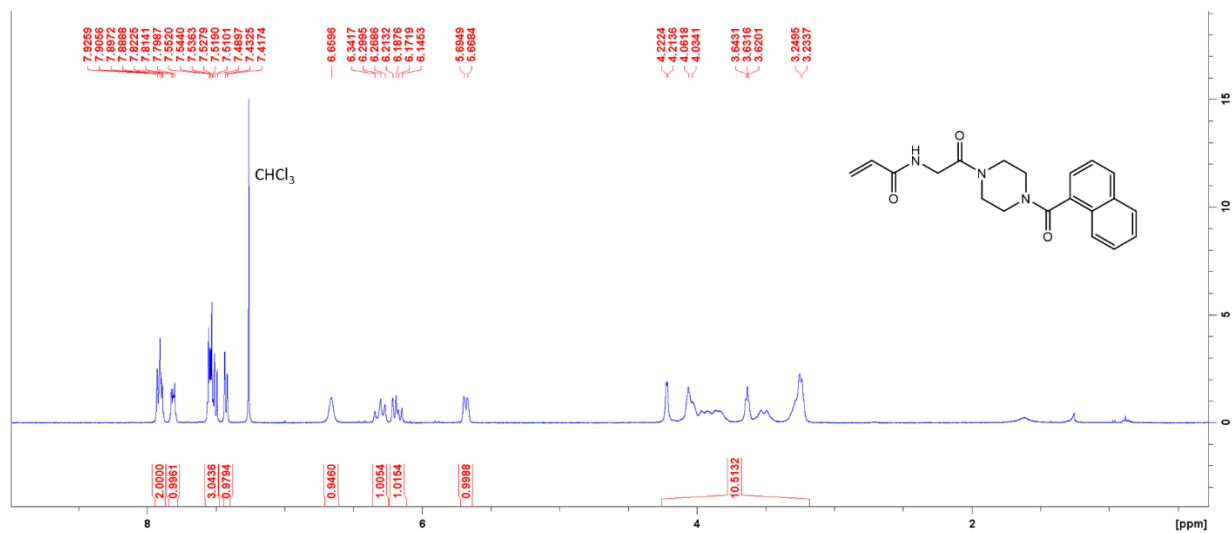

$^{13}\text{C}$  NMR spectrum (101 MHz,  $\text{CDCl}_3$ ) of **24a**:

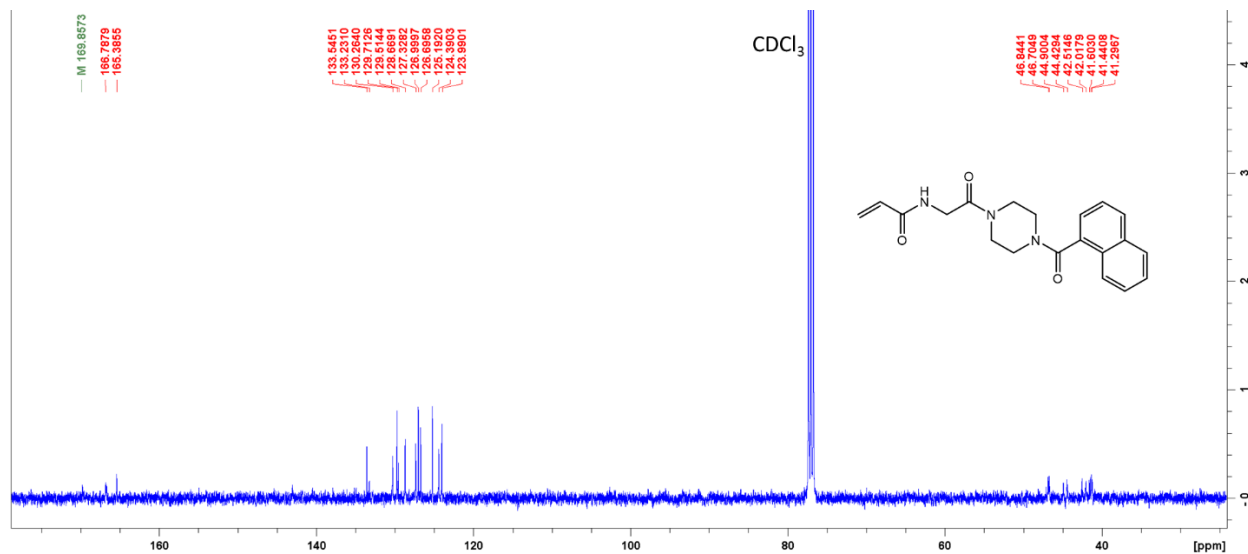

$^1\text{H}$  NMR spectrum (400 MHz,  $\text{CDCl}_3$ ) of **24b**:

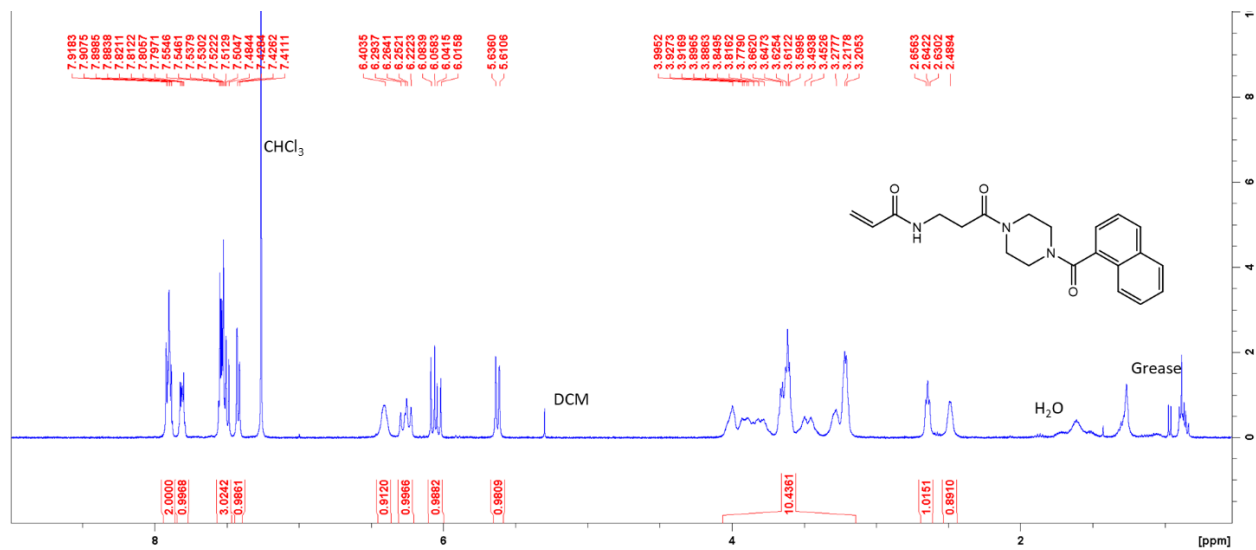

$^{13}\text{C}$  NMR spectrum (101 MHz,  $\text{CDCl}_3$ ) of **24b**:

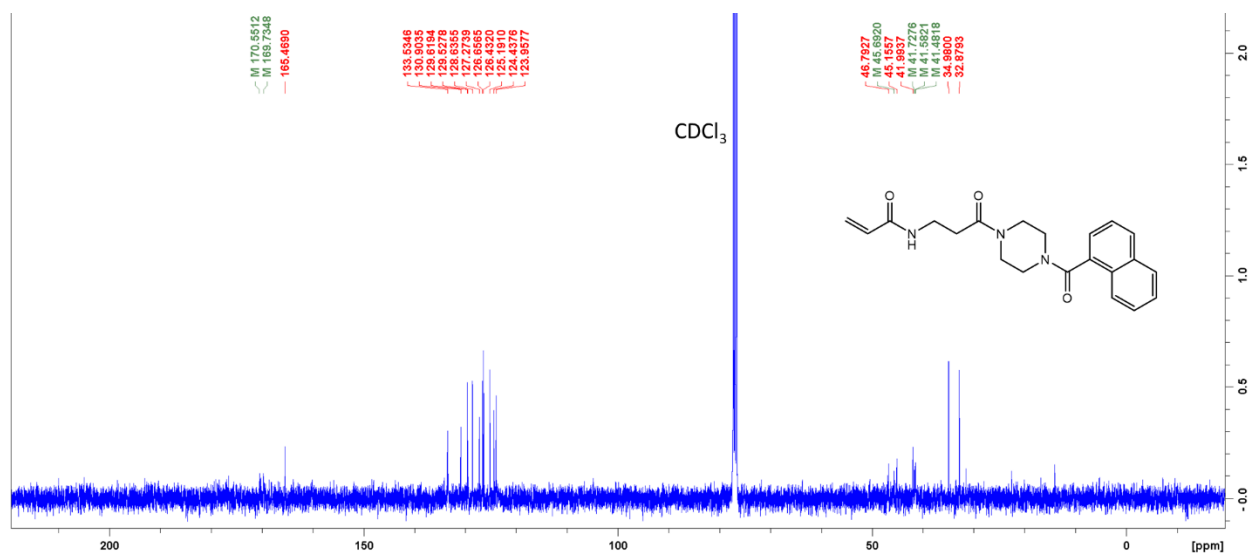

$^1\text{H}$  NMR spectrum (400 MHz,  $\text{CDCl}_3$ ) of **24c**:

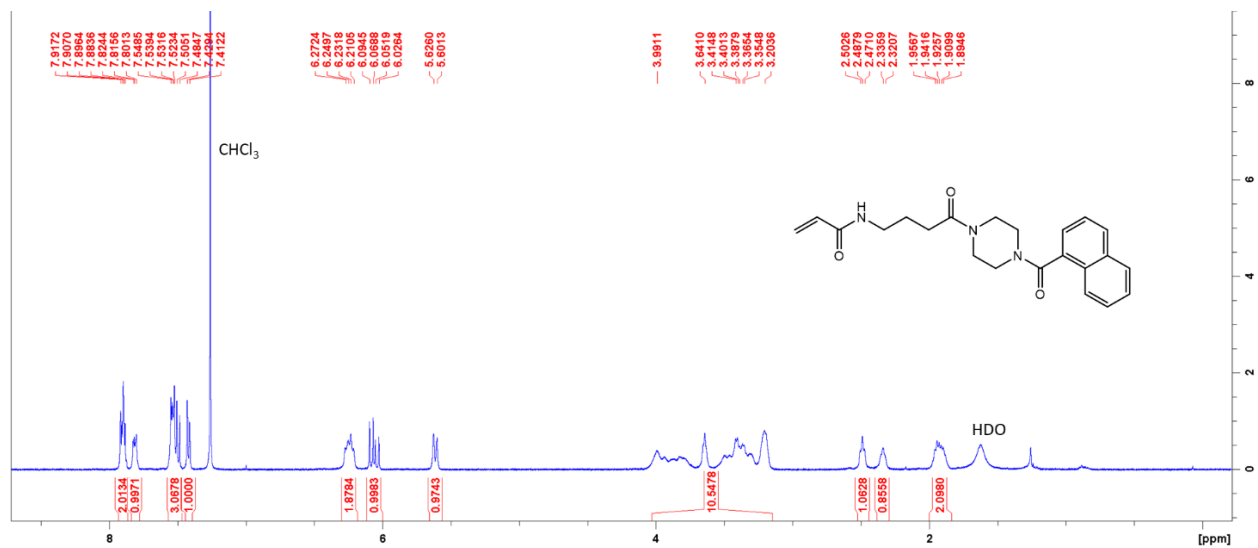

$^{13}\text{C}$  NMR spectrum (101 MHz,  $\text{CDCl}_3$ ) of **24c**:

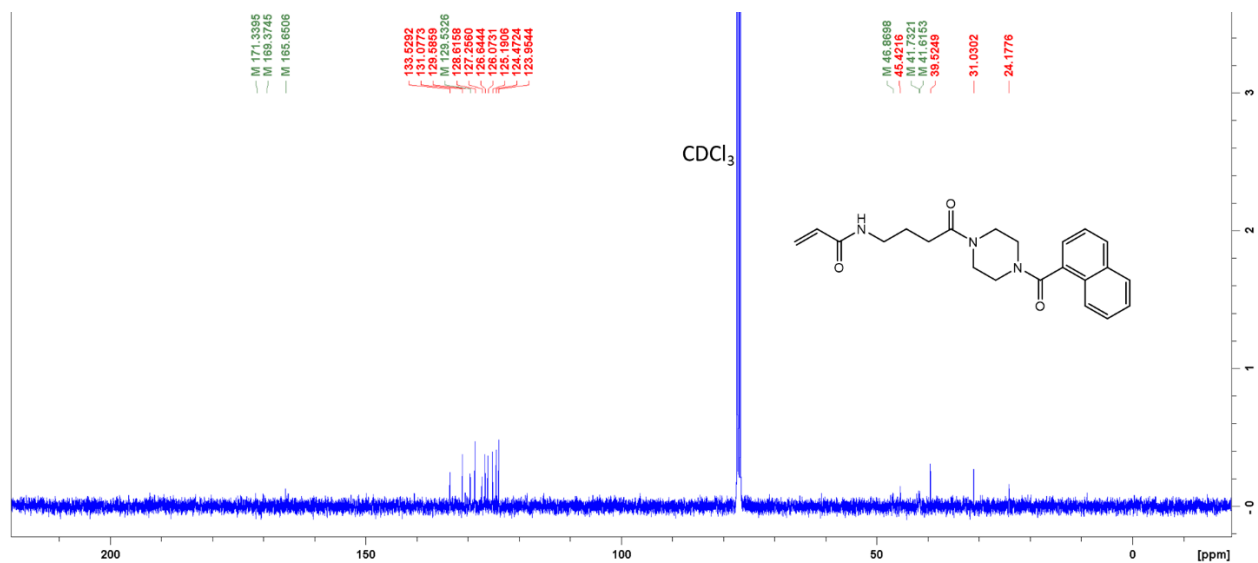

$^1\text{H}$  NMR spectrum (400 MHz,  $\text{CDCl}_3$ ) of **24d**:

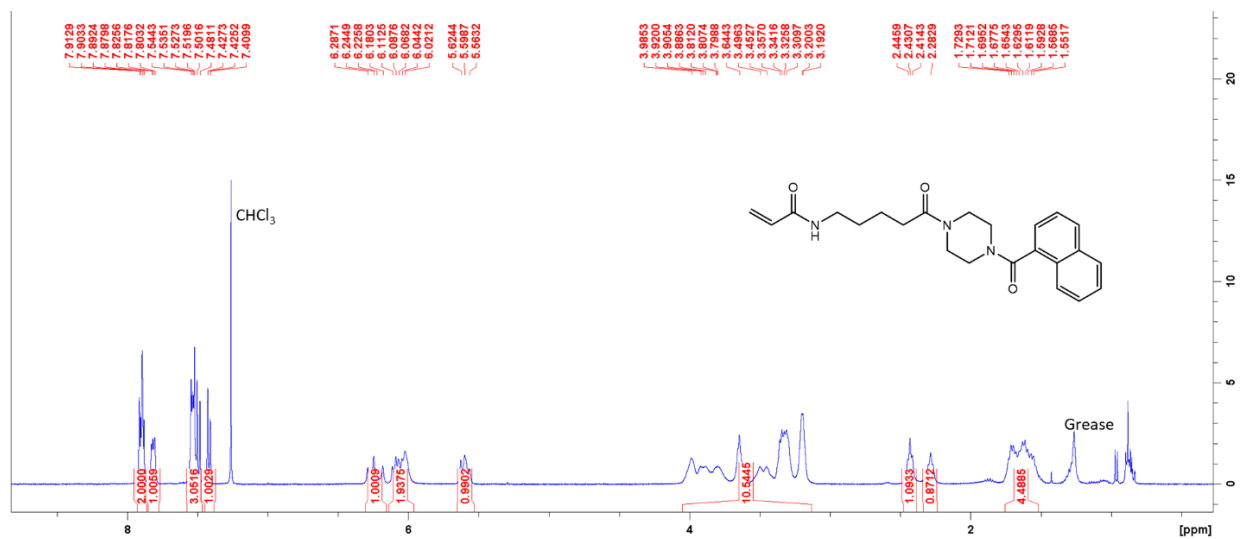

$^{13}\text{C}$  NMR spectrum (101 MHz,  $\text{CDCl}_3$ ) of **24d**:

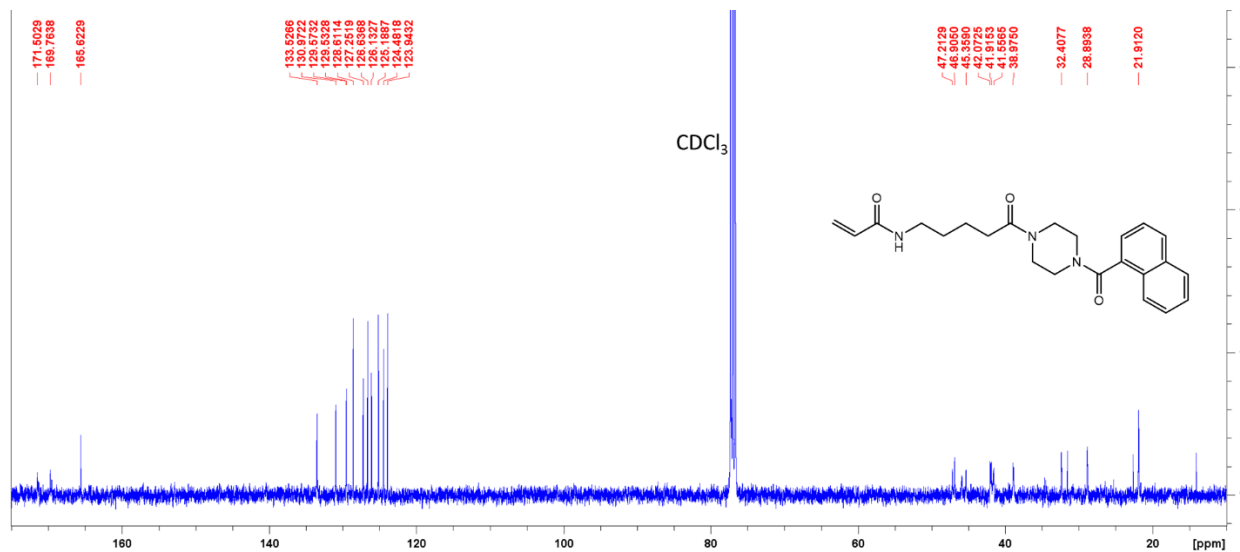

$^1\text{H}$  NMR spectrum (400 MHz,  $\text{CDCl}_3$ ) of **24e**:

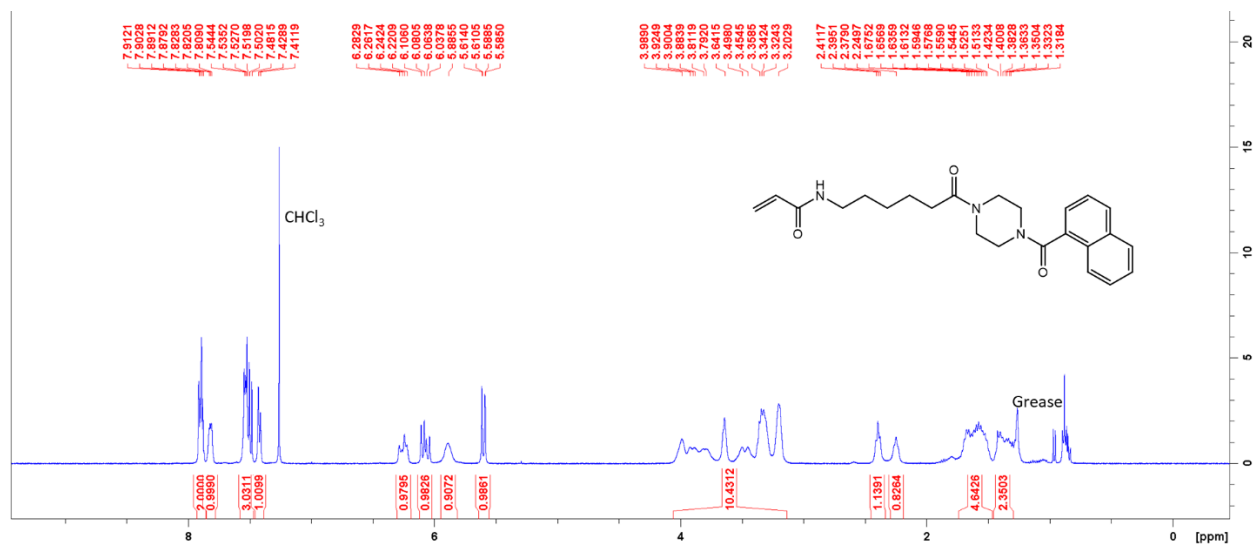

$^{13}\text{C}$  NMR spectrum (101 MHz,  $\text{CDCl}_3$ ) of **24e**:

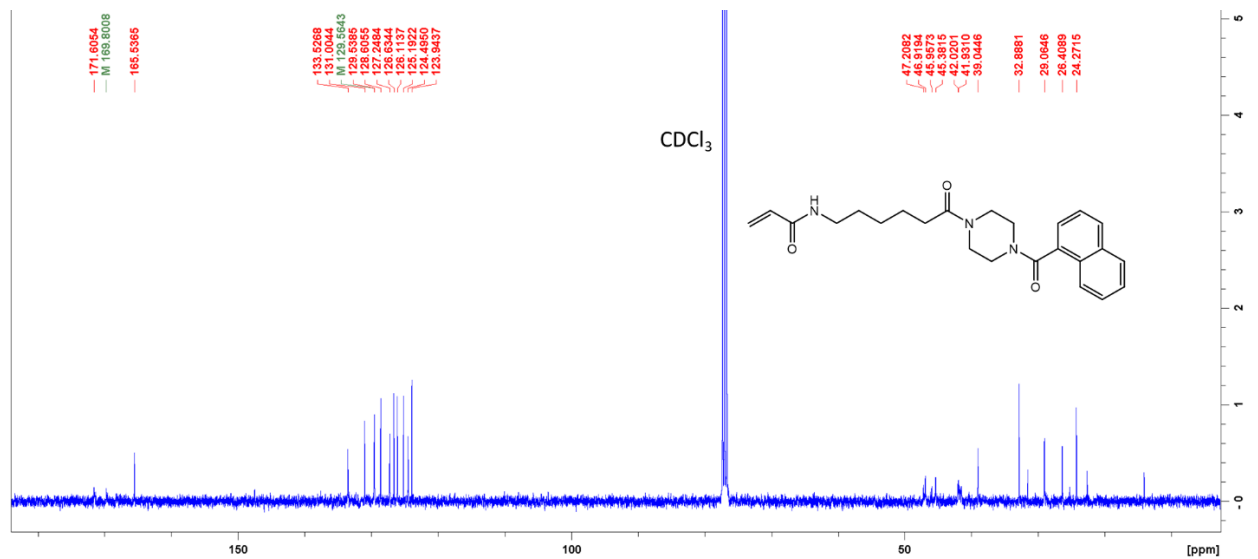

$^1\text{H}$  NMR spectrum (400 MHz,  $\text{CDCl}_3$ ) of **25a**:

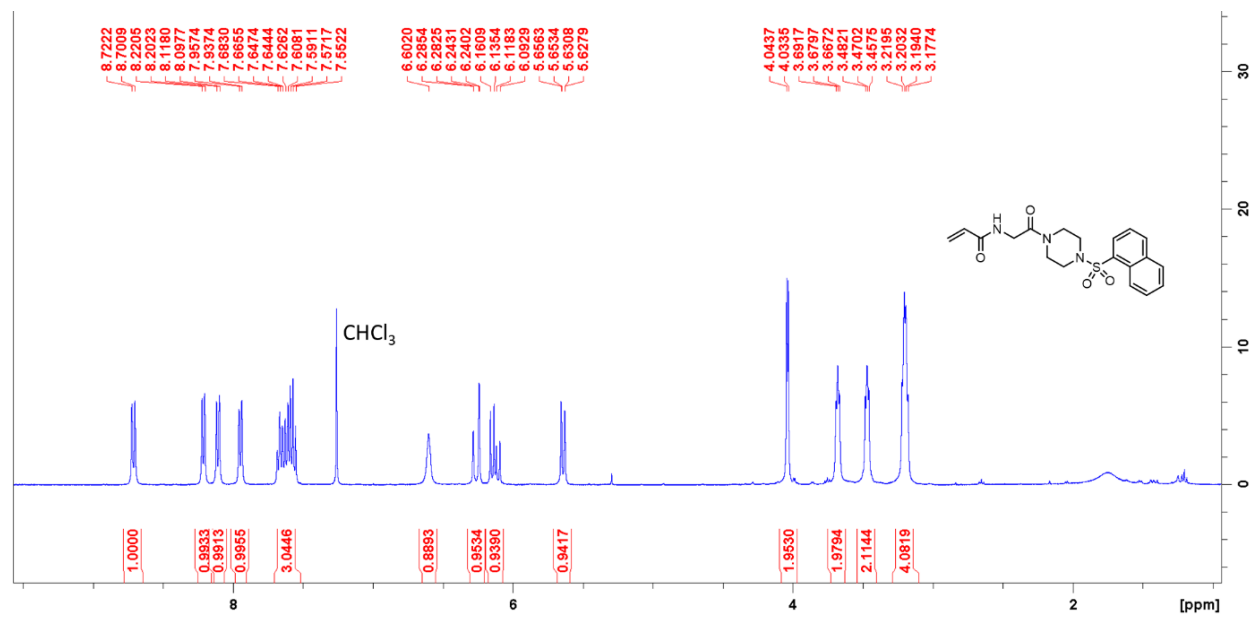

$^{13}\text{C}$  NMR spectrum (101 MHz,  $\text{CDCl}_3$ ) of **25a**:

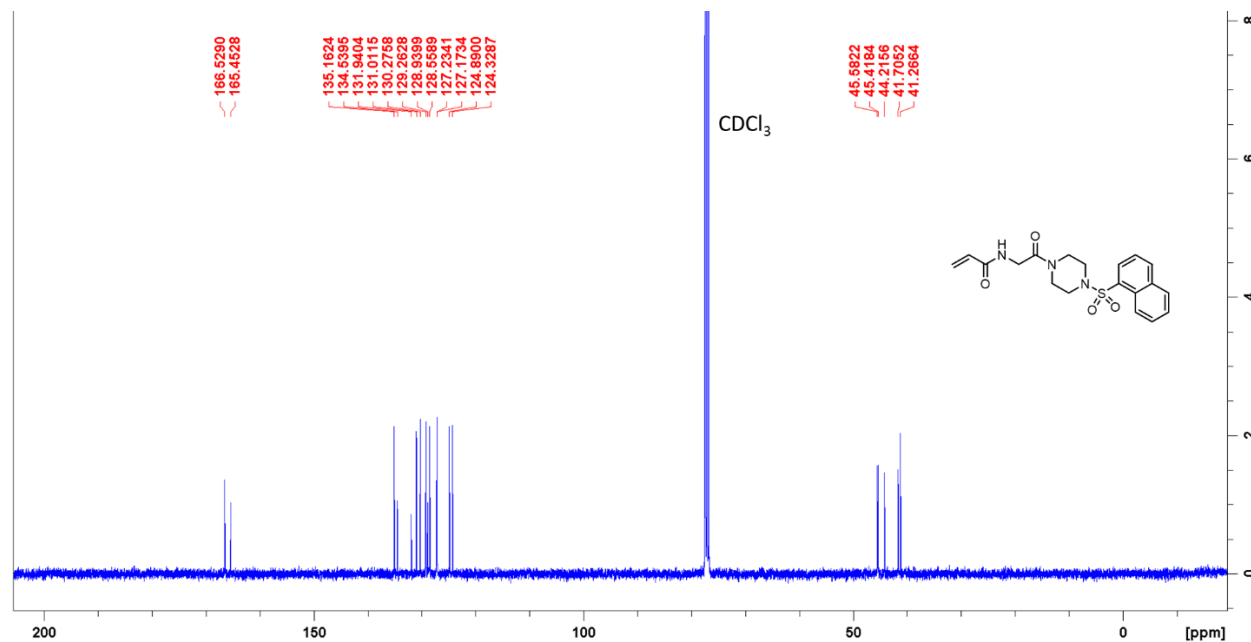

Supplement: d1md00382h1.pdf [file d1md00382h1.pdf]
